# Supplementary material
Source: MDPI journal article supplement (https://www.mdpi.com/2306-5729/4/1/23)
Supplement: s1 [file s1]

Cases (E-commerce Sites)	CustomerID	Activity Type	Date	Quantity
Case1	CustomerID_1	view	8/14/18	1
Case1	CustomerID_2	view	8/12/18	1
Case1	CustomerID_3	view	8/10/18	1
Case1	CustomerID_4	view	8/14/18	1
Case1	CustomerID_5	view	8/16/18	1
Case1	CustomerID_6	view	8/19/18	1
Case1	CustomerID_7	view	8/18/18	11
Case1	CustomerID_8	view	8/18/18	3
Case1	CustomerID_9	view	8/14/18	1
Case1	CustomerID_10	view	8/13/18	1
Case1	CustomerID_11	view	8/16/18	1
Case1	CustomerID_12	view	8/11/18	1
Case1	CustomerID_13	view	8/10/18	2
Case1	CustomerID_14	view	8/16/18	1
Case1	CustomerID_15	view	8/14/18	1
Case1	CustomerID_16	view	8/11/18	2
Case1	CustomerID_16	view	8/12/18	2
Case1	CustomerID_17	view	8/15/18	1
Case1	CustomerID_18	view	8/10/18	1
Case1	CustomerID_19	view	8/11/18	2
Case1	CustomerID_20	view	8/19/18	1
Case1	CustomerID_21	view	8/14/18	1
Case1	CustomerID_22	view	8/10/18	1
Case1	CustomerID_23	view	8/16/18	5
Case1	CustomerID_24	view	8/10/18	2
Case1	CustomerID_25	view	8/18/18	8
Case1	CustomerID_26	view	8/13/18	1
Case1	CustomerID_27	view	8/17/18	1
Case1	CustomerID_28	view	8/16/18	2
Case1	CustomerID_29	view	8/14/18	1
Case1	CustomerID_29	view	8/16/18	1
Case1	CustomerID_30	view	8/16/18	1
Case1	CustomerID_31	view	8/18/18	2
Case1	CustomerID_32	view	8/16/18	1
Case1	CustomerID_33	view	8/16/18	2
Case1	CustomerID_34	view	8/11/18	1
Case1	CustomerID_35	view	8/17/18	4
Case1	CustomerID_36	view	8/15/18	10
Case1	CustomerID_36	view	8/16/18	1
Case1	CustomerID_37	view	8/10/18	1
Case1	CustomerID_38	view	8/17/18	1
Case1	CustomerID_39	view	8/17/18	1
Case1	CustomerID_40	view	8/16/18	1
Case1	CustomerID_41	view	8/15/18	9
Case1	CustomerID_42	view	8/11/18	1
Case1	CustomerID_43	view	8/12/18	1
Case1	CustomerID_44	view	8/14/18	1
Case1	CustomerID_45	view	8/17/18	1
Case1	CustomerID_46	view	8/19/18	6
Case1	CustomerID_47	view	8/11/18	1
Case1	CustomerID_48	view	8/14/18	1
Case1	CustomerID_49	view	8/14/18	1
Case1	CustomerID_50	view	8/16/18	1
Case1	CustomerID_51	view	8/15/18	2
Case1	CustomerID_52	view	8/11/18	1
Case1	CustomerID_53	view	8/18/18	2
Case1	CustomerID_54	view	8/12/18	38
Case1	CustomerID_55	view	8/12/18	13
Case1	CustomerID_56	view	8/14/18	1
Case1	CustomerID_57	view	8/18/18	1
Case1	CustomerID_58	view	8/11/18	1
Case1	CustomerID_59	view	8/15/18	1
Case1	CustomerID_60	view	8/11/18	1
Case1	CustomerID_61	view	8/12/18	1
Case1	CustomerID_62	view	8/18/18	1
Case1	CustomerID_63	view	8/13/18	1
Case1	CustomerID_64	view	8/17/18	1
Case1	CustomerID_65	view	8/10/18	3
Case1	CustomerID_66	view	8/12/18	3
Case1	CustomerID_67	view	8/12/18	2
Case1	CustomerID_68	view	8/15/18	1
Case1	CustomerID_69	view	8/15/18	2
Case1	CustomerID_69	view	8/16/18	4
Case1	CustomerID_69	view	8/17/18	3
Case1	CustomerID_69	view	8/18/18	1
Case1	CustomerID_70	view	8/19/18	1
Case1	CustomerID_71	view	8/11/18	1
Case1	CustomerID_72	view	8/11/18	9
Case1	CustomerID_73	view	8/14/18	7
Case1	CustomerID_74	view	8/11/18	1
Case1	CustomerID_75	view	8/14/18	3
Case1	CustomerID_76	view	8/16/18	1
Case1	CustomerID_77	view	8/19/18	9
Case1	CustomerID_78	view	8/13/18	2
Case1	CustomerID_78	view	8/14/18	1
Case1	CustomerID_78	view	8/16/18	3
Case1	CustomerID_78	view	8/18/18	6
Case1	CustomerID_78	view	8/19/18	1
Case1	CustomerID_79	view	8/17/18	1
Case1	CustomerID_80	view	8/19/18	1
Case1	CustomerID_81	view	8/12/18	5
Case1	CustomerID_82	view	8/19/18	7
Case1	CustomerID_83	view	8/13/18	1
Case1	CustomerID_84	view	8/11/18	2
Case1	CustomerID_85	view	8/14/18	1
Case1	CustomerID_86	view	8/15/18	1
Case1	CustomerID_87	view	8/14/18	4
Case1	CustomerID_88	view	8/16/18	1
Case1	CustomerID_89	view	8/17/18	4
Case1	CustomerID_90	view	8/11/18	1
Case1	CustomerID_91	view	8/10/18	1
Case1	CustomerID_92	view	8/17/18	1
Case1	CustomerID_93	view	8/11/18	7
Case1	CustomerID_94	view	8/10/18	2
Case1	CustomerID_95	view	8/13/18	2
Case1	CustomerID_96	view	8/11/18	3
Case1	CustomerID_97	view	8/12/18	2
Case1	CustomerID_98	view	8/16/18	1
Case1	CustomerID_99	view	8/14/18	2
Case1	CustomerID_100	view	8/14/18	1
Case1	CustomerID_101	view	8/16/18	1
Case1	CustomerID_102	view	8/18/18	1
Case1	CustomerID_103	view	8/18/18	1
Case1	CustomerID_104	view	8/13/18	3
Case1	CustomerID_105	view	8/12/18	3
Case1	CustomerID_106	view	8/17/18	14
Case1	CustomerID_107	view	8/14/18	1
Case1	CustomerID_108	view	8/11/18	10
Case1	CustomerID_108	view	8/14/18	3
Case1	CustomerID_109	view	8/19/18	1
Case1	CustomerID_110	view	8/10/18	1
Case1	CustomerID_111	view	8/11/18	1
Case1	CustomerID_112	view	8/19/18	1
Case1	CustomerID_113	view	8/19/18	1
Case1	CustomerID_114	view	8/12/18	1
Case1	CustomerID_115	view	8/17/18	1
Case1	CustomerID_116	view	8/14/18	1
Case1	CustomerID_117	view	8/19/18	5
Case1	CustomerID_118	view	8/12/18	7
Case1	CustomerID_119	view	8/17/18	1
Case1	CustomerID_120	view	8/10/18	2
Case1	CustomerID_121	view	8/14/18	4
Case1	CustomerID_122	view	8/15/18	1
Case1	CustomerID_123	view	8/16/18	1
Case1	CustomerID_124	view	8/12/18	2
Case1	CustomerID_125	view	8/16/18	10
Case1	CustomerID_126	view	8/18/18	9
Case1	CustomerID_127	view	8/17/18	2
Case1	CustomerID_128	view	8/16/18	3
Case1	CustomerID_129	view	8/14/18	1
Case1	CustomerID_130	view	8/15/18	4
Case1	CustomerID_131	view	8/10/18	2
Case1	CustomerID_132	view	8/15/18	2
Case1	CustomerID_133	view	8/17/18	1
Case1	CustomerID_134	view	8/14/18	1
Case1	CustomerID_135	view	8/16/18	2
Case1	CustomerID_136	view	8/10/18	2
Case1	CustomerID_137	view	8/18/18	1
Case1	CustomerID_138	view	8/15/18	1
Case1	CustomerID_139	view	8/18/18	1
Case1	CustomerID_140	view	8/19/18	11
Case1	CustomerID_141	view	8/10/18	1
Case1	CustomerID_141	view	8/13/18	1
Case1	CustomerID_142	view	8/18/18	3
Case1	CustomerID_143	view	8/10/18	1
Case1	CustomerID_144	view	8/11/18	1
Case1	CustomerID_145	view	8/17/18	3
Case1	CustomerID_146	view	8/12/18	1
Case1	CustomerID_147	view	8/18/18	2
Case1	CustomerID_148	view	8/16/18	1
Case1	CustomerID_149	view	8/12/18	1
Case1	CustomerID_150	view	8/17/18	2
Case1	CustomerID_151	view	8/17/18	1
Case1	CustomerID_152	view	8/15/18	1
Case1	CustomerID_153	view	8/11/18	1
Case1	CustomerID_154	view	8/10/18	4
Case1	CustomerID_155	view	8/19/18	2
Case1	CustomerID_156	view	8/10/18	1
Case1	CustomerID_157	view	8/19/18	1
Case1	CustomerID_158	view	8/14/18	1
Case1	CustomerID_158	view	8/16/18	1
Case1	CustomerID_159	view	8/19/18	1
Case1	CustomerID_160	view	8/19/18	1
Case1	CustomerID_161	view	8/19/18	1
Case1	CustomerID_162	view	8/18/18	3
Case1	CustomerID_163	view	8/11/18	1
Case1	CustomerID_164	view	8/10/18	1
Case1	CustomerID_165	view	8/18/18	1
Case1	CustomerID_166	view	8/17/18	1
Case1	CustomerID_167	view	8/12/18	8
Case1	CustomerID_168	view	8/11/18	1
Case1	CustomerID_169	view	8/13/18	1
Case1	CustomerID_170	view	8/11/18	1
Case1	CustomerID_171	view	8/18/18	1
Case1	CustomerID_172	view	8/18/18	1
Case1	CustomerID_173	view	8/18/18	2
Case1	CustomerID_174	view	8/17/18	6
Case1	CustomerID_175	view	8/11/18	2
Case1	CustomerID_176	view	8/19/18	4
Case1	CustomerID_177	view	8/12/18	2
Case1	CustomerID_178	view	8/17/18	1
Case1	CustomerID_179	view	8/13/18	1
Case1	CustomerID_180	view	8/17/18	2
Case1	CustomerID_181	view	8/14/18	3
Case1	CustomerID_182	view	8/10/18	2
Case1	CustomerID_183	view	8/19/18	1
Case1	CustomerID_184	view	8/10/18	1
Case1	CustomerID_185	view	8/10/18	4
Case1	CustomerID_186	view	8/10/18	12
Case1	CustomerID_186	view	8/13/18	2
Case1	CustomerID_187	view	8/11/18	2
Case1	CustomerID_188	view	8/11/18	1
Case1	CustomerID_189	view	8/10/18	12
Case1	CustomerID_190	view	8/17/18	1
Case1	CustomerID_191	view	8/11/18	1
Case1	CustomerID_191	view	8/12/18	1
Case1	CustomerID_192	view	8/10/18	1
Case1	CustomerID_193	view	8/11/18	6
Case1	CustomerID_194	view	8/16/18	1
Case1	CustomerID_195	view	8/14/18	1
Case1	CustomerID_196	view	8/12/18	2
Case1	CustomerID_197	view	8/16/18	11
Case1	CustomerID_197	view	8/19/18	1
Case1	CustomerID_198	view	8/10/18	1
Case1	CustomerID_199	view	8/12/18	1
Case1	CustomerID_200	view	8/15/18	2
Case1	CustomerID_201	view	8/12/18	1
Case1	CustomerID_202	view	8/15/18	1
Case1	CustomerID_203	view	8/18/18	1
Case1	CustomerID_204	view	8/12/18	2
Case1	CustomerID_205	view	8/10/18	3
Case1	CustomerID_206	view	8/11/18	1
Case1	CustomerID_207	view	8/11/18	1
Case1	CustomerID_208	view	8/14/18	4
Case1	CustomerID_209	view	8/19/18	1
Case1	CustomerID_210	view	8/10/18	6
Case1	CustomerID_211	view	8/11/18	5
Case1	CustomerID_211	view	8/18/18	10
Case1	CustomerID_212	view	8/13/18	1
Case1	CustomerID_212	view	8/18/18	1
Case1	CustomerID_213	view	8/16/18	1
Case1	CustomerID_214	view	8/13/18	1
Case1	CustomerID_215	view	8/14/18	1
Case1	CustomerID_216	view	8/14/18	2
Case1	CustomerID_217	view	8/12/18	9
Case1	CustomerID_218	view	8/14/18	1
Case1	CustomerID_219	view	8/11/18	1
Case1	CustomerID_220	view	8/10/18	1
Case1	CustomerID_221	view	8/10/18	1
Case1	CustomerID_222	view	8/19/18	1
Case1	CustomerID_223	view	8/15/18	2
Case1	CustomerID_224	view	8/13/18	1
Case1	CustomerID_225	view	8/14/18	1
Case1	CustomerID_226	view	8/10/18	1
Case1	CustomerID_227	view	8/12/18	4
Case1	CustomerID_227	view	8/14/18	2
Case1	CustomerID_227	view	8/15/18	1
Case1	CustomerID_228	view	8/10/18	2
Case1	CustomerID_229	view	8/15/18	1
Case1	CustomerID_230	view	8/14/18	1
Case1	CustomerID_231	view	8/12/18	4
Case1	CustomerID_232	view	8/18/18	1
Case1	CustomerID_233	view	8/16/18	3
Case1	CustomerID_234	view	8/14/18	2
Case1	CustomerID_235	view	8/18/18	2
Case1	CustomerID_236	view	8/16/18	1
Case1	CustomerID_237	view	8/12/18	1
Case1	CustomerID_238	view	8/18/18	1
Case1	CustomerID_239	view	8/15/18	3
Case1	CustomerID_240	view	8/17/18	2
Case1	CustomerID_241	view	8/10/18	1
Case1	CustomerID_242	view	8/19/18	2
Case1	CustomerID_243	view	8/16/18	1
Case1	CustomerID_244	view	8/12/18	1
Case1	CustomerID_245	view	8/12/18	1
Case1	CustomerID_246	view	8/17/18	1
Case1	CustomerID_247	view	8/19/18	9
Case1	CustomerID_248	view	8/14/18	1
Case1	CustomerID_249	view	8/11/18	1
Case1	CustomerID_250	view	8/18/18	1
Case1	CustomerID_251	view	8/13/18	2
Case1	CustomerID_252	view	8/17/18	1
Case1	CustomerID_253	view	8/14/18	1
Case1	CustomerID_254	view	8/12/18	1
Case1	CustomerID_255	view	8/10/18	4
Case1	CustomerID_256	view	8/14/18	1
Case1	CustomerID_257	view	8/16/18	1
Case1	CustomerID_258	view	8/14/18	1
Case1	CustomerID_259	view	8/13/18	4
Case1	CustomerID_260	view	8/10/18	1
Case1	CustomerID_261	view	8/13/18	1
Case1	CustomerID_262	view	8/12/18	24
Case1	CustomerID_263	view	8/12/18	1
Case1	CustomerID_264	view	8/18/18	4
Case1	CustomerID_265	view	8/13/18	2
Case1	CustomerID_266	view	8/16/18	1
Case1	CustomerID_267	view	8/18/18	3
Case1	CustomerID_268	view	8/13/18	4
Case1	CustomerID_269	view	8/11/18	1
Case1	CustomerID_270	view	8/10/18	3
Case1	CustomerID_271	view	8/13/18	1
Case1	CustomerID_272	view	8/11/18	11
Case1	CustomerID_273	view	8/11/18	3
Case1	CustomerID_274	view	8/14/18	1
Case1	CustomerID_275	view	8/13/18	2
Case1	CustomerID_276	view	8/11/18	1
Case1	CustomerID_277	view	8/11/18	1
Case1	CustomerID_278	view	8/10/18	1
Case1	CustomerID_279	view	8/12/18	1
Case1	CustomerID_280	view	8/11/18	1
Case1	CustomerID_281	view	8/17/18	4
Case1	CustomerID_282	view	8/19/18	1
Case1	CustomerID_283	view	8/15/18	2
Case1	CustomerID_284	view	8/17/18	3
Case1	CustomerID_285	view	8/15/18	1
Case1	CustomerID_286	view	8/16/18	6
Case1	CustomerID_287	view	8/17/18	1
Case1	CustomerID_288	view	8/15/18	1
Case1	CustomerID_289	view	8/19/18	2
Case1	CustomerID_290	view	8/14/18	28
Case1	CustomerID_291	view	8/19/18	6
Case1	CustomerID_292	view	8/16/18	6
Case1	CustomerID_293	view	8/18/18	1
Case1	CustomerID_294	view	8/16/18	1
Case1	CustomerID_295	view	8/17/18	1
Case1	CustomerID_296	view	8/10/18	2
Case1	CustomerID_297	view	8/12/18	5
Case1	CustomerID_298	view	8/11/18	2
Case1	CustomerID_299	view	8/19/18	1
Case1	CustomerID_300	view	8/14/18	1
Case1	CustomerID_301	view	8/11/18	3
Case1	CustomerID_301	view	8/16/18	1
Case1	CustomerID_301	view	8/18/18	2
Case1	CustomerID_302	view	8/13/18	11
Case1	CustomerID_303	view	8/16/18	1
Case1	CustomerID_304	view	8/15/18	4
Case1	CustomerID_305	view	8/11/18	1
Case1	CustomerID_306	view	8/13/18	1
Case1	CustomerID_307	view	8/19/18	5
Case1	CustomerID_308	view	8/12/18	2
Case1	CustomerID_309	view	8/13/18	1
Case1	CustomerID_310	view	8/13/18	1
Case1	CustomerID_311	view	8/14/18	2
Case1	CustomerID_312	view	8/11/18	1
Case1	CustomerID_313	view	8/16/18	1
Case1	CustomerID_314	view	8/19/18	1
Case1	CustomerID_315	view	8/11/18	21
Case1	CustomerID_316	view	8/16/18	2
Case1	CustomerID_317	view	8/11/18	1
Case1	CustomerID_318	view	8/12/18	1
Case1	CustomerID_319	view	8/19/18	3
Case1	CustomerID_320	view	8/12/18	1
Case1	CustomerID_321	view	8/11/18	5
Case1	CustomerID_322	view	8/15/18	1
Case1	CustomerID_323	view	8/11/18	2
Case1	CustomerID_324	view	8/15/18	1
Case1	CustomerID_325	view	8/11/18	1
Case1	CustomerID_326	view	8/16/18	2
Case1	CustomerID_327	view	8/10/18	1
Case1	CustomerID_328	view	8/10/18	1
Case1	CustomerID_329	view	8/11/18	1
Case1	CustomerID_330	view	8/12/18	2
Case1	CustomerID_331	view	8/18/18	1
Case1	CustomerID_332	view	8/18/18	7
Case1	CustomerID_332	view	8/19/18	12
Case1	CustomerID_333	view	8/16/18	1
Case1	CustomerID_334	view	8/11/18	1
Case1	CustomerID_335	view	8/15/18	1
Case1	CustomerID_336	view	8/18/18	7
Case1	CustomerID_337	view	8/18/18	22
Case1	CustomerID_337	view	8/19/18	9
Case1	CustomerID_338	view	8/15/18	1
Case1	CustomerID_339	view	8/10/18	1
Case1	CustomerID_340	view	8/14/18	2
Case1	CustomerID_341	view	8/19/18	4
Case1	CustomerID_342	view	8/14/18	1
Case1	CustomerID_343	view	8/18/18	2
Case1	CustomerID_344	view	8/13/18	2
Case1	CustomerID_345	view	8/15/18	1
Case1	CustomerID_346	view	8/15/18	2
Case1	CustomerID_347	view	8/13/18	1
Case1	CustomerID_348	view	8/11/18	1
Case1	CustomerID_349	view	8/13/18	1
Case1	CustomerID_350	view	8/19/18	1
Case1	CustomerID_351	view	8/14/18	7
Case1	CustomerID_352	view	8/11/18	1
Case1	CustomerID_353	view	8/15/18	4
Case1	CustomerID_354	view	8/18/18	4
Case1	CustomerID_355	view	8/18/18	1
Case1	CustomerID_356	view	8/10/18	1
Case1	CustomerID_357	view	8/16/18	1
Case1	CustomerID_358	view	8/12/18	6
Case1	CustomerID_359	view	8/15/18	1
Case1	CustomerID_360	view	8/17/18	1
Case1	CustomerID_361	view	8/15/18	12
Case1	CustomerID_362	view	8/18/18	1
Case1	CustomerID_363	view	8/16/18	1
Case1	CustomerID_364	view	8/18/18	1
Case1	CustomerID_365	view	8/13/18	6
Case1	CustomerID_365	view	8/17/18	3
Case1	CustomerID_366	view	8/13/18	1
Case1	CustomerID_367	view	8/17/18	1
Case1	CustomerID_368	view	8/11/18	1
Case1	CustomerID_369	view	8/19/18	1
Case1	CustomerID_370	view	8/13/18	1
Case1	CustomerID_371	view	8/14/18	1
Case1	CustomerID_372	view	8/13/18	1
Case1	CustomerID_373	view	8/14/18	1
Case1	CustomerID_374	view	8/17/18	1
Case1	CustomerID_375	view	8/16/18	1
Case1	CustomerID_376	view	8/17/18	1
Case1	CustomerID_377	view	8/11/18	1
Case1	CustomerID_378	view	8/16/18	1
Case1	CustomerID_379	view	8/10/18	4
Case1	CustomerID_380	view	8/11/18	1
Case1	CustomerID_381	view	8/12/18	1
Case1	CustomerID_382	view	8/17/18	1
Case1	CustomerID_383	view	8/18/18	2
Case1	CustomerID_384	view	8/18/18	22
Case1	CustomerID_385	view	8/18/18	7
Case1	CustomerID_386	view	8/11/18	1
Case1	CustomerID_386	view	8/18/18	1
Case1	CustomerID_387	view	8/11/18	2
Case1	CustomerID_387	view	8/12/18	4
Case1	CustomerID_388	view	8/13/18	3
Case1	CustomerID_389	view	8/12/18	1
Case1	CustomerID_390	view	8/12/18	1
Case1	CustomerID_391	view	8/19/18	2
Case1	CustomerID_392	view	8/15/18	6
Case1	CustomerID_393	view	8/19/18	11
Case1	CustomerID_394	view	8/17/18	5
Case1	CustomerID_395	view	8/17/18	1
Case1	CustomerID_396	view	8/15/18	2
Case1	CustomerID_397	view	8/13/18	1
Case1	CustomerID_397	view	8/16/18	2
Case1	CustomerID_398	view	8/18/18	1
Case1	CustomerID_399	view	8/11/18	7
Case1	CustomerID_400	view	8/17/18	1
Case1	CustomerID_401	view	8/12/18	1
Case1	CustomerID_402	view	8/19/18	3
Case1	CustomerID_403	view	8/13/18	1
Case1	CustomerID_404	view	8/19/18	3
Case1	CustomerID_405	view	8/13/18	1
Case1	CustomerID_405	view	8/14/18	1
Case1	CustomerID_406	view	8/18/18	26
Case1	CustomerID_406	view	8/19/18	15
Case1	CustomerID_407	view	8/17/18	1
Case1	CustomerID_408	view	8/18/18	1
Case1	CustomerID_409	view	8/18/18	2
Case1	CustomerID_410	view	8/11/18	1
Case1	CustomerID_411	view	8/14/18	1
Case1	CustomerID_412	view	8/10/18	1
Case1	CustomerID_413	view	8/15/18	1
Case1	CustomerID_414	view	8/12/18	2
Case1	CustomerID_415	view	8/13/18	1
Case1	CustomerID_416	view	8/10/18	1
Case1	CustomerID_416	view	8/12/18	6
Case1	CustomerID_416	view	8/15/18	1
Case1	CustomerID_417	view	8/18/18	1
Case1	CustomerID_418	view	8/19/18	2
Case1	CustomerID_419	view	8/19/18	5
Case1	CustomerID_420	view	8/12/18	6
Case1	CustomerID_420	view	8/13/18	3
Case1	CustomerID_421	view	8/16/18	1
Case1	CustomerID_422	view	8/12/18	1
Case1	CustomerID_423	view	8/19/18	1
Case1	CustomerID_424	view	8/19/18	3
Case1	CustomerID_425	view	8/16/18	1
Case1	CustomerID_426	view	8/19/18	1
Case1	CustomerID_427	view	8/13/18	1
Case1	CustomerID_428	view	8/11/18	1
Case1	CustomerID_429	view	8/14/18	2
Case1	CustomerID_430	view	8/13/18	1
Case1	CustomerID_431	view	8/12/18	14
Case1	CustomerID_432	view	8/11/18	3
Case1	CustomerID_433	view	8/18/18	1
Case1	CustomerID_434	view	8/14/18	5
Case1	CustomerID_435	view	8/15/18	4
Case1	CustomerID_436	view	8/12/18	3
Case1	CustomerID_436	view	8/16/18	3
Case1	CustomerID_437	view	8/11/18	1
Case1	CustomerID_438	view	8/10/18	1
Case1	CustomerID_439	view	8/12/18	1
Case1	CustomerID_440	view	8/19/18	1
Case1	CustomerID_441	view	8/11/18	2
Case1	CustomerID_442	view	8/18/18	5
Case1	CustomerID_443	view	8/10/18	2
Case1	CustomerID_444	view	8/18/18	1
Case1	CustomerID_445	view	8/14/18	1
Case1	CustomerID_446	view	8/10/18	2
Case1	CustomerID_447	view	8/18/18	1
Case1	CustomerID_448	view	8/12/18	1
Case1	CustomerID_449	view	8/15/18	5
Case1	CustomerID_450	view	8/10/18	2
Case1	CustomerID_451	view	8/12/18	1
Case1	CustomerID_452	view	8/11/18	1
Case1	CustomerID_453	view	8/12/18	11
Case1	CustomerID_454	view	8/11/18	10
Case1	CustomerID_455	view	8/19/18	4
Case1	CustomerID_456	view	8/15/18	1
Case1	CustomerID_457	view	8/12/18	1
Case1	CustomerID_458	view	8/16/18	3
Case1	CustomerID_459	view	8/12/18	3
Case1	CustomerID_460	view	8/14/18	1
Case1	CustomerID_461	view	8/12/18	1
Case1	CustomerID_462	view	8/10/18	2
Case1	CustomerID_463	view	8/18/18	1
Case1	CustomerID_464	view	8/14/18	3
Case1	CustomerID_465	view	8/15/18	1
Case1	CustomerID_466	view	8/10/18	1
Case1	CustomerID_467	view	8/12/18	3
Case1	CustomerID_468	view	8/10/18	4
Case1	CustomerID_469	view	8/14/18	1
Case1	CustomerID_470	view	8/18/18	2
Case1	CustomerID_471	view	8/19/18	6
Case1	CustomerID_472	view	8/16/18	1
Case1	CustomerID_473	view	8/16/18	14
Case1	CustomerID_473	view	8/17/18	6
Case1	CustomerID_474	view	8/17/18	1
Case1	CustomerID_475	view	8/17/18	6
Case1	CustomerID_476	view	8/17/18	2
Case1	CustomerID_477	view	8/12/18	6
Case1	CustomerID_478	view	8/19/18	1
Case1	CustomerID_479	view	8/15/18	1
Case1	CustomerID_480	view	8/17/18	1
Case1	CustomerID_480	view	8/18/18	2
Case1	CustomerID_481	view	8/12/18	1
Case1	CustomerID_482	view	8/18/18	6
Case1	CustomerID_483	view	8/14/18	2
Case1	CustomerID_484	view	8/10/18	8
Case1	CustomerID_485	view	8/18/18	1
Case1	CustomerID_486	view	8/11/18	1
Case1	CustomerID_487	view	8/12/18	13
Case1	CustomerID_488	view	8/10/18	2
Case1	CustomerID_489	view	8/15/18	1
Case1	CustomerID_490	view	8/11/18	4
Case1	CustomerID_491	view	8/19/18	1
Case1	CustomerID_492	view	8/10/18	1
Case1	CustomerID_492	view	8/11/18	2
Case1	CustomerID_493	view	8/11/18	2
Case1	CustomerID_494	view	8/17/18	4
Case1	CustomerID_495	view	8/19/18	10
Case1	CustomerID_496	view	8/13/18	1
Case1	CustomerID_497	view	8/12/18	3
Case1	CustomerID_498	view	8/10/18	2
Case1	CustomerID_499	view	8/14/18	1
Case1	CustomerID_499	view	8/15/18	1
Case1	CustomerID_500	view	8/16/18	1
Case1	CustomerID_501	view	8/10/18	4
Case1	CustomerID_502	view	8/18/18	2
Case1	CustomerID_503	view	8/18/18	1
Case1	CustomerID_504	view	8/16/18	3
Case1	CustomerID_505	view	8/11/18	1
Case1	CustomerID_506	view	8/13/18	1
Case1	CustomerID_507	view	8/11/18	2
Case1	CustomerID_508	view	8/16/18	1
Case1	CustomerID_509	view	8/10/18	1
Case1	CustomerID_510	view	8/11/18	4
Case1	CustomerID_511	view	8/14/18	1
Case1	CustomerID_512	view	8/11/18	1
Case1	CustomerID_512	view	8/12/18	1
Case1	CustomerID_513	view	8/13/18	1
Case1	CustomerID_513	view	8/14/18	6
Case1	CustomerID_514	view	8/11/18	2
Case1	CustomerID_515	view	8/16/18	3
Case1	CustomerID_515	view	8/18/18	1
Case1	CustomerID_516	view	8/11/18	1
Case1	CustomerID_517	view	8/12/18	2
Case1	CustomerID_518	view	8/16/18	1
Case1	CustomerID_519	view	8/10/18	1
Case1	CustomerID_520	view	8/10/18	4
Case1	CustomerID_520	view	8/11/18	2
Case1	CustomerID_520	view	8/12/18	1
Case1	CustomerID_521	view	8/16/18	1
Case1	CustomerID_522	view	8/12/18	1
Case1	CustomerID_523	view	8/14/18	3
Case1	CustomerID_524	view	8/11/18	3
Case1	CustomerID_525	view	8/17/18	1
Case1	CustomerID_526	view	8/14/18	1
Case1	CustomerID_527	view	8/13/18	1
Case1	CustomerID_528	view	8/14/18	1
Case1	CustomerID_529	view	8/17/18	2
Case1	CustomerID_530	view	8/14/18	1
Case1	CustomerID_531	view	8/15/18	1
Case1	CustomerID_532	view	8/17/18	1
Case1	CustomerID_533	view	8/15/18	1
Case1	CustomerID_534	view	8/12/18	3
Case1	CustomerID_535	view	8/14/18	1
Case1	CustomerID_536	view	8/15/18	3
Case1	CustomerID_537	view	8/13/18	5
Case1	CustomerID_537	view	8/18/18	1
Case1	CustomerID_538	view	8/17/18	1
Case1	CustomerID_539	view	8/13/18	2
Case1	CustomerID_540	view	8/18/18	1
Case1	CustomerID_541	view	8/13/18	2
Case1	CustomerID_542	view	8/12/18	1
Case1	CustomerID_543	view	8/14/18	4
Case1	CustomerID_544	view	8/14/18	1
Case1	CustomerID_545	view	8/12/18	1
Case1	CustomerID_546	view	8/14/18	1
Case1	CustomerID_547	view	8/11/18	4
Case1	CustomerID_548	view	8/13/18	1
Case1	CustomerID_549	view	8/10/18	2
Case1	CustomerID_550	view	8/16/18	3
Case1	CustomerID_550	view	8/19/18	11
Case1	CustomerID_551	view	8/15/18	25
Case1	CustomerID_552	view	8/14/18	1
Case1	CustomerID_553	view	8/11/18	1
Case1	CustomerID_554	view	8/17/18	1
Case1	CustomerID_555	view	8/14/18	1
Case1	CustomerID_556	view	8/19/18	1
Case1	CustomerID_557	view	8/18/18	11
Case1	CustomerID_558	view	8/12/18	1
Case1	CustomerID_559	view	8/15/18	1
Case1	CustomerID_560	view	8/18/18	1
Case1	CustomerID_561	view	8/15/18	2
Case1	CustomerID_562	view	8/12/18	1
Case1	CustomerID_563	view	8/18/18	1
Case1	CustomerID_564	view	8/14/18	1
Case1	CustomerID_565	view	8/11/18	6
Case1	CustomerID_566	view	8/14/18	2
Case1	CustomerID_567	view	8/13/18	2
Case1	CustomerID_568	view	8/10/18	1
Case1	CustomerID_569	view	8/12/18	1
Case1	CustomerID_570	view	8/17/18	1
Case1	CustomerID_571	view	8/15/18	2
Case1	CustomerID_572	view	8/17/18	1
Case1	CustomerID_573	view	8/11/18	1
Case1	CustomerID_574	view	8/16/18	19
Case1	CustomerID_575	view	8/19/18	1
Case1	CustomerID_576	view	8/11/18	1
Case1	CustomerID_577	view	8/18/18	1
Case1	CustomerID_578	view	8/10/18	1
Case1	CustomerID_579	view	8/10/18	6
Case1	CustomerID_579	view	8/11/18	1
Case1	CustomerID_580	view	8/17/18	1
Case1	CustomerID_581	view	8/15/18	1
Case1	CustomerID_582	view	8/15/18	1
Case1	CustomerID_583	view	8/17/18	2
Case1	CustomerID_584	view	8/15/18	2
Case1	CustomerID_585	view	8/18/18	1
Case1	CustomerID_586	view	8/18/18	1
Case1	CustomerID_587	view	8/13/18	1
Case1	CustomerID_588	view	8/18/18	4
Case1	CustomerID_589	view	8/17/18	12
Case1	CustomerID_589	view	8/18/18	2
Case1	CustomerID_590	view	8/13/18	1
Case1	CustomerID_591	view	8/17/18	1
Case1	CustomerID_592	view	8/14/18	11
Case1	CustomerID_593	view	8/17/18	7
Case1	CustomerID_594	view	8/14/18	2
Case1	CustomerID_595	view	8/15/18	5
Case1	CustomerID_596	view	8/14/18	1
Case1	CustomerID_597	view	8/18/18	1
Case1	CustomerID_598	view	8/12/18	3
Case1	CustomerID_599	view	8/12/18	2
Case1	CustomerID_600	view	8/10/18	1
Case1	CustomerID_601	view	8/19/18	1
Case1	CustomerID_602	view	8/18/18	1
Case1	CustomerID_603	view	8/17/18	15
Case1	CustomerID_604	view	8/11/18	1
Case1	CustomerID_605	view	8/12/18	3
Case1	CustomerID_606	view	8/13/18	8
Case1	CustomerID_606	view	8/15/18	3
Case1	CustomerID_607	view	8/15/18	1
Case1	CustomerID_608	view	8/11/18	1
Case1	CustomerID_609	view	8/19/18	3
Case1	CustomerID_610	view	8/12/18	6
Case1	CustomerID_611	view	8/19/18	1
Case1	CustomerID_612	view	8/19/18	2
Case1	CustomerID_613	view	8/13/18	3
Case1	CustomerID_614	view	8/15/18	1
Case1	CustomerID_615	view	8/10/18	1
Case1	CustomerID_616	view	8/13/18	1
Case1	CustomerID_617	view	8/10/18	1
Case1	CustomerID_618	view	8/17/18	11
Case1	CustomerID_619	view	8/15/18	1
Case1	CustomerID_620	view	8/13/18	1
Case1	CustomerID_621	view	8/16/18	1
Case1	CustomerID_622	view	8/10/18	1
Case1	CustomerID_623	view	8/14/18	25
Case1	CustomerID_623	view	8/15/18	3
Case1	CustomerID_624	view	8/13/18	2
Case1	CustomerID_625	view	8/16/18	2
Case1	CustomerID_626	view	8/12/18	1
Case1	CustomerID_627	view	8/14/18	1
Case1	CustomerID_628	view	8/18/18	1
Case1	CustomerID_629	view	8/14/18	1
Case1	CustomerID_630	view	8/18/18	1
Case1	CustomerID_631	view	8/12/18	3
Case1	CustomerID_632	view	8/11/18	5
Case1	CustomerID_633	view	8/16/18	1
Case1	CustomerID_634	view	8/18/18	2
Case1	CustomerID_635	view	8/14/18	17
Case1	CustomerID_636	view	8/18/18	1
Case1	CustomerID_637	view	8/15/18	3
Case1	CustomerID_638	view	8/12/18	1
Case1	CustomerID_639	view	8/14/18	1
Case1	CustomerID_640	view	8/12/18	9
Case1	CustomerID_640	view	8/15/18	2
Case1	CustomerID_640	view	8/17/18	2
Case1	CustomerID_641	view	8/13/18	1
Case1	CustomerID_642	view	8/18/18	3
Case1	CustomerID_643	view	8/19/18	1
Case1	CustomerID_644	view	8/17/18	1
Case1	CustomerID_645	view	8/15/18	1
Case1	CustomerID_646	view	8/10/18	1
Case1	CustomerID_647	view	8/12/18	3
Case1	CustomerID_648	view	8/18/18	6
Case1	CustomerID_649	view	8/13/18	3
Case1	CustomerID_650	view	8/13/18	1
Case1	CustomerID_651	view	8/14/18	11
Case1	CustomerID_652	view	8/14/18	2
Case1	CustomerID_653	view	8/13/18	6
Case1	CustomerID_654	view	8/18/18	1
Case1	CustomerID_655	view	8/12/18	1
Case1	CustomerID_656	view	8/14/18	1
Case1	CustomerID_657	view	8/13/18	1
Case1	CustomerID_658	view	8/13/18	1
Case1	CustomerID_659	view	8/18/18	1
Case1	CustomerID_660	view	8/18/18	4
Case1	CustomerID_661	view	8/18/18	6
Case1	CustomerID_662	view	8/19/18	1
Case1	CustomerID_663	view	8/10/18	1
Case1	CustomerID_664	view	8/12/18	1
Case1	CustomerID_665	view	8/15/18	1
Case1	CustomerID_666	view	8/17/18	1
Case1	CustomerID_667	view	8/19/18	1
Case1	CustomerID_668	view	8/11/18	2
Case1	CustomerID_669	view	8/10/18	2
Case1	CustomerID_670	view	8/10/18	1
Case1	CustomerID_670	view	8/11/18	5
Case1	CustomerID_671	view	8/18/18	1
Case1	CustomerID_672	view	8/14/18	1
Case1	CustomerID_673	view	8/18/18	1
Case1	CustomerID_674	view	8/14/18	1
Case1	CustomerID_675	view	8/11/18	1
Case1	CustomerID_676	view	8/18/18	2
Case1	CustomerID_677	view	8/16/18	1
Case1	CustomerID_678	view	8/13/18	1
Case1	CustomerID_679	view	8/11/18	1
Case1	CustomerID_680	view	8/16/18	3
Case1	CustomerID_681	view	8/17/18	3
Case1	CustomerID_682	view	8/14/18	1
Case1	CustomerID_683	view	8/18/18	1
Case1	CustomerID_684	view	8/16/18	1
Case1	CustomerID_685	view	8/18/18	1
Case1	CustomerID_686	view	8/16/18	10
Case1	CustomerID_687	view	8/12/18	3
Case1	CustomerID_688	view	8/15/18	1
Case1	CustomerID_689	view	8/12/18	2
Case1	CustomerID_690	view	8/12/18	8
Case1	CustomerID_690	view	8/19/18	2
Case1	CustomerID_691	view	8/12/18	3
Case1	CustomerID_692	view	8/19/18	1
Case1	CustomerID_693	view	8/18/18	5
Case1	CustomerID_694	view	8/12/18	1
Case1	CustomerID_695	view	8/18/18	3
Case1	CustomerID_696	view	8/18/18	1
Case1	CustomerID_697	view	8/17/18	13
Case1	CustomerID_698	view	8/10/18	1
Case1	CustomerID_699	view	8/16/18	1
Case1	CustomerID_700	view	8/10/18	1
Case1	CustomerID_701	view	8/17/18	6
Case1	CustomerID_702	view	8/14/18	4
Case1	CustomerID_703	view	8/19/18	1
Case1	CustomerID_704	view	8/12/18	1
Case1	CustomerID_705	view	8/13/18	1
Case1	CustomerID_706	view	8/12/18	1
Case1	CustomerID_707	view	8/17/18	1
Case1	CustomerID_708	view	8/13/18	1
Case1	CustomerID_709	view	8/11/18	1
Case1	CustomerID_710	view	8/13/18	2
Case1	CustomerID_711	view	8/17/18	1
Case1	CustomerID_712	view	8/16/18	1
Case1	CustomerID_713	view	8/18/18	1
Case1	CustomerID_714	view	8/19/18	1
Case1	CustomerID_715	view	8/12/18	1
Case1	CustomerID_716	view	8/17/18	1
Case1	CustomerID_717	view	8/11/18	8
Case1	CustomerID_717	view	8/14/18	7
Case1	CustomerID_717	view	8/15/18	30
Case1	CustomerID_717	view	8/16/18	10
Case1	CustomerID_717	view	8/17/18	2
Case1	CustomerID_718	view	8/16/18	1
Case1	CustomerID_719	view	8/19/18	1
Case1	CustomerID_720	view	8/11/18	1
Case1	CustomerID_721	view	8/19/18	1
Case1	CustomerID_722	view	8/19/18	7
Case1	CustomerID_723	view	8/12/18	1
Case1	CustomerID_724	view	8/13/18	1
Case1	CustomerID_725	view	8/13/18	1
Case1	CustomerID_726	view	8/14/18	12
Case1	CustomerID_727	view	8/13/18	1
Case1	CustomerID_728	view	8/18/18	1
Case1	CustomerID_729	view	8/10/18	7
Case1	CustomerID_730	view	8/12/18	1
Case1	CustomerID_731	view	8/10/18	1
Case1	CustomerID_732	view	8/11/18	1
Case1	CustomerID_733	view	8/17/18	1
Case1	CustomerID_734	view	8/15/18	1
Case1	CustomerID_735	view	8/12/18	1
Case1	CustomerID_736	view	8/11/18	1
Case1	CustomerID_737	view	8/18/18	16
Case1	CustomerID_738	view	8/10/18	1
Case1	CustomerID_738	view	8/11/18	2
Case1	CustomerID_738	view	8/13/18	11
Case1	CustomerID_738	view	8/15/18	4
Case1	CustomerID_739	view	8/13/18	2
Case1	CustomerID_740	view	8/10/18	1
Case1	CustomerID_741	view	8/10/18	1
Case1	CustomerID_742	view	8/14/18	1
Case1	CustomerID_743	view	8/14/18	1
Case1	CustomerID_744	view	8/12/18	1
Case1	CustomerID_745	view	8/18/18	3
Case1	CustomerID_746	view	8/13/18	1
Case1	CustomerID_747	view	8/13/18	31
Case1	CustomerID_747	view	8/17/18	1
Case1	CustomerID_748	view	8/11/18	1
Case1	CustomerID_749	view	8/12/18	1
Case1	CustomerID_750	view	8/18/18	1
Case1	CustomerID_751	view	8/19/18	1
Case1	CustomerID_752	view	8/17/18	2
Case1	CustomerID_753	view	8/18/18	1
Case1	CustomerID_754	view	8/12/18	1
Case1	CustomerID_755	view	8/17/18	1
Case1	CustomerID_756	view	8/19/18	1
Case1	CustomerID_757	view	8/15/18	1
Case1	CustomerID_758	view	8/19/18	4
Case1	CustomerID_759	view	8/12/18	1
Case1	CustomerID_760	view	8/16/18	1
Case1	CustomerID_761	view	8/14/18	1
Case1	CustomerID_762	view	8/10/18	2
Case1	CustomerID_763	view	8/16/18	2
Case1	CustomerID_764	view	8/18/18	1
Case1	CustomerID_765	view	8/15/18	1
Case1	CustomerID_766	view	8/18/18	1
Case1	CustomerID_767	view	8/17/18	1
Case1	CustomerID_768	view	8/16/18	1
Case1	CustomerID_769	view	8/19/18	5
Case1	CustomerID_770	view	8/19/18	6
Case1	CustomerID_771	view	8/12/18	1
Case1	CustomerID_772	view	8/15/18	6
Case1	CustomerID_773	view	8/16/18	2
Case1	CustomerID_774	view	8/13/18	1
Case1	CustomerID_775	view	8/16/18	1
Case1	CustomerID_776	view	8/11/18	1
Case1	CustomerID_777	view	8/17/18	1
Case1	CustomerID_778	view	8/19/18	6
Case1	CustomerID_779	view	8/15/18	1
Case1	CustomerID_780	view	8/16/18	1
Case1	CustomerID_780	view	8/19/18	1
Case1	CustomerID_781	view	8/15/18	1
Case1	CustomerID_782	view	8/10/18	1
Case1	CustomerID_783	view	8/18/18	2
Case1	CustomerID_784	view	8/18/18	1
Case1	CustomerID_785	view	8/12/18	1
Case1	CustomerID_786	view	8/18/18	1
Case1	CustomerID_787	view	8/11/18	1
Case1	CustomerID_788	view	8/18/18	1
Case1	CustomerID_789	view	8/15/18	1
Case1	CustomerID_790	view	8/14/18	1
Case1	CustomerID_791	view	8/18/18	3
Case1	CustomerID_792	view	8/17/18	12
Case1	CustomerID_793	view	8/16/18	5
Case1	CustomerID_793	view	8/17/18	16
Case1	CustomerID_794	view	8/13/18	2
Case1	CustomerID_795	view	8/11/18	1
Case1	CustomerID_796	view	8/11/18	1
Case1	CustomerID_797	view	8/19/18	1
Case1	CustomerID_798	view	8/14/18	1
Case1	CustomerID_799	view	8/13/18	11
Case1	CustomerID_799	view	8/19/18	3
Case1	CustomerID_800	view	8/18/18	1
Case1	CustomerID_801	view	8/13/18	2
Case1	CustomerID_802	view	8/10/18	2
Case1	CustomerID_803	view	8/18/18	4
Case1	CustomerID_804	view	8/13/18	1
Case1	CustomerID_805	view	8/11/18	1
Case1	CustomerID_806	view	8/15/18	1
Case1	CustomerID_807	view	8/15/18	1
Case1	CustomerID_808	view	8/19/18	1
Case1	CustomerID_809	view	8/10/18	7
Case1	CustomerID_810	view	8/18/18	5
Case1	CustomerID_810	view	8/19/18	1
Case1	CustomerID_811	view	8/16/18	1
Case1	CustomerID_812	view	8/12/18	1
Case1	CustomerID_813	view	8/14/18	1
Case1	CustomerID_814	view	8/14/18	2
Case1	CustomerID_815	view	8/10/18	1
Case1	CustomerID_816	view	8/15/18	1
Case1	CustomerID_817	view	8/19/18	1
Case1	CustomerID_818	view	8/15/18	2
Case1	CustomerID_819	view	8/12/18	10
Case1	CustomerID_820	view	8/10/18	1
Case1	CustomerID_821	view	8/11/18	1
Case1	CustomerID_821	view	8/12/18	1
Case1	CustomerID_822	view	8/10/18	3
Case1	CustomerID_823	view	8/14/18	1
Case1	CustomerID_824	view	8/16/18	3
Case1	CustomerID_825	view	8/18/18	1
Case1	CustomerID_826	view	8/17/18	1
Case1	CustomerID_827	view	8/19/18	2
Case1	CustomerID_828	view	8/15/18	1
Case1	CustomerID_829	view	8/17/18	10
Case1	CustomerID_830	view	8/18/18	1
Case1	CustomerID_831	view	8/18/18	2
Case1	CustomerID_832	view	8/13/18	3
Case1	CustomerID_833	view	8/11/18	1
Case1	CustomerID_834	view	8/10/18	5
Case1	CustomerID_835	view	8/14/18	5
Case1	CustomerID_836	view	8/15/18	1
Case1	CustomerID_837	view	8/13/18	1
Case1	CustomerID_838	view	8/15/18	1
Case1	CustomerID_839	view	8/11/18	2
Case1	CustomerID_840	view	8/10/18	1
Case1	CustomerID_841	view	8/18/18	4
Case1	CustomerID_842	view	8/12/18	1
Case1	CustomerID_843	view	8/14/18	1
Case1	CustomerID_844	view	8/18/18	4
Case1	CustomerID_845	view	8/18/18	1
Case1	CustomerID_846	view	8/12/18	1
Case1	CustomerID_847	view	8/14/18	1
Case1	CustomerID_848	view	8/10/18	1
Case1	CustomerID_849	view	8/18/18	1
Case1	CustomerID_850	view	8/11/18	5
Case1	CustomerID_851	view	8/16/18	1
Case1	CustomerID_852	view	8/15/18	3
Case1	CustomerID_853	view	8/16/18	1
Case1	CustomerID_854	view	8/14/18	1
Case1	CustomerID_855	view	8/12/18	1
Case1	CustomerID_856	view	8/14/18	1
Case1	CustomerID_857	view	8/13/18	1
Case1	CustomerID_858	view	8/12/18	1
Case1	CustomerID_859	view	8/11/18	3
Case1	CustomerID_860	view	8/14/18	1
Case1	CustomerID_861	view	8/12/18	1
Case1	CustomerID_862	view	8/18/18	4
Case1	CustomerID_863	view	8/10/18	1
Case1	CustomerID_863	view	8/17/18	1
Case1	CustomerID_864	view	8/15/18	1
Case1	CustomerID_865	view	8/16/18	1
Case1	CustomerID_866	view	8/18/18	1
Case1	CustomerID_866	view	8/19/18	1
Case1	CustomerID_867	view	8/14/18	1
Case1	CustomerID_868	view	8/17/18	2
Case1	CustomerID_868	view	8/19/18	2
Case1	CustomerID_869	view	8/11/18	1
Case1	CustomerID_870	view	8/16/18	1
Case1	CustomerID_871	view	8/18/18	1
Case1	CustomerID_872	view	8/18/18	7
Case1	CustomerID_873	view	8/15/18	2
Case1	CustomerID_874	view	8/17/18	1
Case1	CustomerID_875	view	8/17/18	1
Case1	CustomerID_876	view	8/12/18	1
Case1	CustomerID_877	view	8/15/18	1
Case1	CustomerID_877	view	8/16/18	1
Case1	CustomerID_878	view	8/14/18	2
Case1	CustomerID_879	view	8/11/18	1
Case1	CustomerID_880	view	8/11/18	7
Case1	CustomerID_880	view	8/12/18	1
Case1	CustomerID_881	view	8/19/18	4
Case1	CustomerID_882	view	8/14/18	1
Case1	CustomerID_883	view	8/15/18	1
Case1	CustomerID_884	view	8/17/18	3
Case1	CustomerID_885	view	8/16/18	1
Case1	CustomerID_886	view	8/18/18	2
Case1	CustomerID_887	view	8/13/18	2
Case1	CustomerID_888	view	8/16/18	1
Case1	CustomerID_889	view	8/12/18	2
Case1	CustomerID_890	view	8/14/18	5
Case1	CustomerID_891	view	8/11/18	1
Case1	CustomerID_892	view	8/16/18	1
Case1	CustomerID_893	view	8/11/18	1
Case1	CustomerID_894	view	8/19/18	1
Case1	CustomerID_895	view	8/19/18	1
Case1	CustomerID_896	view	8/10/18	4
Case1	CustomerID_897	view	8/12/18	1
Case1	CustomerID_898	view	8/18/18	1
Case1	CustomerID_899	view	8/19/18	1
Case1	CustomerID_900	view	8/11/18	1
Case1	CustomerID_901	view	8/17/18	2
Case1	CustomerID_901	view	8/19/18	10
Case1	CustomerID_902	view	8/13/18	1
Case1	CustomerID_903	view	8/15/18	3
Case1	CustomerID_904	view	8/12/18	2
Case1	CustomerID_905	view	8/12/18	1
Case1	CustomerID_906	view	8/14/18	1
Case1	CustomerID_907	view	8/15/18	1
Case1	CustomerID_908	view	8/10/18	1
Case1	CustomerID_909	view	8/11/18	2
Case1	CustomerID_910	view	8/11/18	1
Case1	CustomerID_911	view	8/11/18	1
Case1	CustomerID_912	view	8/17/18	1
Case1	CustomerID_913	view	8/11/18	1
Case1	CustomerID_914	view	8/11/18	3
Case1	CustomerID_915	view	8/13/18	5
Case1	CustomerID_916	view	8/13/18	1
Case1	CustomerID_917	view	8/13/18	1
Case1	CustomerID_918	view	8/14/18	2
Case1	CustomerID_919	view	8/10/18	2
Case1	CustomerID_920	view	8/19/18	2
Case1	CustomerID_921	view	8/11/18	6
Case1	CustomerID_922	view	8/14/18	2
Case1	CustomerID_923	view	8/19/18	1
Case1	CustomerID_924	view	8/16/18	1
Case1	CustomerID_925	view	8/12/18	1
Case1	CustomerID_926	view	8/18/18	1
Case1	CustomerID_927	view	8/15/18	23
Case1	CustomerID_927	view	8/16/18	14
Case1	CustomerID_927	view	8/17/18	8
Case1	CustomerID_928	view	8/13/18	15
Case1	CustomerID_929	view	8/17/18	1
Case1	CustomerID_930	view	8/14/18	1
Case1	CustomerID_931	view	8/12/18	2
Case1	CustomerID_932	view	8/18/18	5
Case1	CustomerID_933	view	8/18/18	2
Case1	CustomerID_934	view	8/16/18	1
Case1	CustomerID_935	view	8/17/18	3
Case1	CustomerID_936	view	8/10/18	1
Case1	CustomerID_937	view	8/18/18	2
Case1	CustomerID_938	view	8/19/18	20
Case1	CustomerID_939	view	8/16/18	1
Case1	CustomerID_940	view	8/13/18	1
Case1	CustomerID_941	view	8/19/18	1
Case1	CustomerID_942	view	8/16/18	1
Case1	CustomerID_943	view	8/14/18	8
Case1	CustomerID_944	view	8/19/18	7
Case1	CustomerID_945	view	8/10/18	3
Case1	CustomerID_946	view	8/10/18	17
Case1	CustomerID_946	view	8/13/18	2
Case1	CustomerID_947	view	8/19/18	1
Case1	CustomerID_948	view	8/19/18	2
Case1	CustomerID_949	view	8/15/18	2
Case1	CustomerID_950	view	8/16/18	1
Case1	CustomerID_951	view	8/10/18	3
Case1	CustomerID_951	view	8/17/18	3
Case1	CustomerID_952	view	8/13/18	1
Case1	CustomerID_952	view	8/14/18	4
Case1	CustomerID_952	view	8/16/18	3
Case1	CustomerID_953	view	8/13/18	1
Case1	CustomerID_954	view	8/16/18	3
Case1	CustomerID_955	view	8/16/18	1
Case1	CustomerID_956	view	8/12/18	9
Case1	CustomerID_957	view	8/17/18	1
Case1	CustomerID_958	view	8/19/18	1
Case1	CustomerID_959	view	8/18/18	1
Case1	CustomerID_960	view	8/14/18	6
Case1	CustomerID_961	view	8/14/18	1
Case1	CustomerID_961	view	8/16/18	2
Case1	CustomerID_962	view	8/17/18	1
Case1	CustomerID_963	view	8/18/18	1
Case1	CustomerID_964	view	8/11/18	1
Case1	CustomerID_965	view	8/14/18	1
Case1	CustomerID_965	view	8/16/18	1
Case1	CustomerID_966	view	8/15/18	1
Case1	CustomerID_967	view	8/14/18	2
Case1	CustomerID_968	view	8/10/18	5
Case1	CustomerID_969	view	8/14/18	1
Case1	CustomerID_970	view	8/10/18	2
Case1	CustomerID_971	view	8/13/18	1
Case1	CustomerID_972	view	8/15/18	1
Case1	CustomerID_973	view	8/15/18	1
Case1	CustomerID_974	view	8/17/18	1
Case1	CustomerID_975	view	8/17/18	1
Case1	CustomerID_976	view	8/16/18	1
Case1	CustomerID_977	view	8/12/18	1
Case1	CustomerID_978	view	8/11/18	1
Case1	CustomerID_979	view	8/16/18	4
Case1	CustomerID_980	view	8/19/18	3
Case1	CustomerID_981	view	8/12/18	2
Case1	CustomerID_981	view	8/13/18	1
Case1	CustomerID_981	view	8/15/18	4
Case1	CustomerID_982	view	8/17/18	1
Case1	CustomerID_983	view	8/17/18	1
Case1	CustomerID_984	view	8/14/18	1
Case1	CustomerID_985	view	8/11/18	6
Case1	CustomerID_985	view	8/18/18	1
Case1	CustomerID_986	view	8/15/18	1
Case1	CustomerID_987	view	8/11/18	1
Case1	CustomerID_988	view	8/19/18	1
Case1	CustomerID_989	view	8/16/18	1
Case1	CustomerID_990	view	8/18/18	16
Case1	CustomerID_991	view	8/18/18	2
Case1	CustomerID_992	view	8/10/18	1
Case1	CustomerID_993	view	8/15/18	1
Case1	CustomerID_994	view	8/18/18	18
Case1	CustomerID_995	view	8/18/18	1
Case1	CustomerID_996	view	8/19/18	1
Case1	CustomerID_997	view	8/19/18	1
Case1	CustomerID_998	view	8/13/18	1
Case1	CustomerID_999	view	8/10/18	2
Case1	CustomerID_999	view	8/11/18	1
Case1	CustomerID_1000	view	8/14/18	15
Case1	CustomerID_1000	view	8/15/18	3
Case1	CustomerID_1000	view	8/17/18	1
Case1	CustomerID_1000	view	8/18/18	5
Case1	CustomerID_1001	view	8/19/18	2
Case1	CustomerID_1002	view	8/11/18	1
Case1	CustomerID_1002	view	8/15/18	2
Case1	CustomerID_1002	view	8/19/18	1
Case1	CustomerID_1003	view	8/10/18	4
Case1	CustomerID_1003	view	8/12/18	1
Case1	CustomerID_1003	view	8/14/18	7
Case1	CustomerID_1003	view	8/15/18	1
Case1	CustomerID_1003	view	8/17/18	3
Case1	CustomerID_1003	view	8/18/18	1
Case1	CustomerID_1004	view	8/19/18	4
Case1	CustomerID_1005	view	8/11/18	1
Case1	CustomerID_1006	view	8/19/18	1
Case1	CustomerID_1007	view	8/10/18	2
Case1	CustomerID_1008	view	8/10/18	2
Case1	CustomerID_1009	view	8/19/18	1
Case1	CustomerID_1010	view	8/11/18	1
Case1	CustomerID_1011	view	8/15/18	4
Case1	CustomerID_1012	view	8/16/18	1
Case1	CustomerID_1013	view	8/10/18	1
Case1	CustomerID_1014	view	8/17/18	14
Case1	CustomerID_1015	view	8/12/18	2
Case1	CustomerID_1016	view	8/17/18	2
Case1	CustomerID_1017	view	8/11/18	1
Case1	CustomerID_1018	view	8/15/18	11
Case1	CustomerID_1018	view	8/16/18	10
Case1	CustomerID_1018	view	8/19/18	1
Case1	CustomerID_1019	view	8/13/18	1
Case1	CustomerID_1020	view	8/17/18	1
Case1	CustomerID_1021	view	8/16/18	1
Case1	CustomerID_1022	view	8/10/18	7
Case1	CustomerID_1023	view	8/17/18	6
Case1	CustomerID_1024	view	8/10/18	1
Case1	CustomerID_1025	view	8/10/18	2
Case1	CustomerID_1026	view	8/13/18	1
Case1	CustomerID_1027	view	8/12/18	1
Case1	CustomerID_1028	view	8/14/18	1
Case1	CustomerID_1029	view	8/10/18	1
Case1	CustomerID_1030	view	8/19/18	1
Case1	CustomerID_1031	view	8/19/18	2
Case1	CustomerID_1032	view	8/12/18	2
Case1	CustomerID_1033	view	8/12/18	4
Case1	CustomerID_1034	view	8/16/18	1
Case1	CustomerID_1035	view	8/10/18	5
Case1	CustomerID_1036	view	8/10/18	1
Case1	CustomerID_1037	view	8/11/18	7
Case1	CustomerID_1038	view	8/10/18	2
Case1	CustomerID_1039	view	8/14/18	1
Case1	CustomerID_1040	view	8/13/18	2
Case1	CustomerID_1040	view	8/15/18	1
Case1	CustomerID_1041	view	8/10/18	7
Case1	CustomerID_1041	view	8/14/18	1
Case1	CustomerID_1042	view	8/16/18	1
Case1	CustomerID_1043	view	8/10/18	1
Case1	CustomerID_1044	view	8/16/18	8
Case1	CustomerID_1044	view	8/18/18	3
Case1	CustomerID_1045	view	8/14/18	1
Case1	CustomerID_1046	view	8/17/18	9
Case1	CustomerID_1047	view	8/12/18	10
Case1	CustomerID_1048	view	8/16/18	1
Case1	CustomerID_1049	view	8/15/18	1
Case1	CustomerID_1050	view	8/15/18	1
Case1	CustomerID_1051	view	8/14/18	1
Case1	CustomerID_1052	view	8/13/18	12
Case1	CustomerID_1053	view	8/14/18	1
Case1	CustomerID_1054	view	8/13/18	2
Case1	CustomerID_1055	view	8/17/18	2
Case1	CustomerID_1056	view	8/12/18	1
Case1	CustomerID_1057	view	8/18/18	2
Case1	CustomerID_1058	view	8/13/18	1
Case1	CustomerID_1059	view	8/14/18	2
Case1	CustomerID_1060	view	8/16/18	18
Case1	CustomerID_1061	view	8/13/18	3
Case1	CustomerID_1062	view	8/11/18	8
Case1	CustomerID_1063	view	8/13/18	1
Case1	CustomerID_1064	view	8/15/18	1
Case1	CustomerID_1065	view	8/12/18	1
Case1	CustomerID_1066	view	8/13/18	1
Case1	CustomerID_1067	view	8/10/18	4
Case1	CustomerID_1068	view	8/15/18	1
Case1	CustomerID_1069	view	8/12/18	4
Case1	CustomerID_1070	view	8/13/18	1
Case1	CustomerID_1071	view	8/10/18	1
Case1	CustomerID_1072	view	8/13/18	2
Case1	CustomerID_1073	view	8/19/18	1
Case1	CustomerID_1074	view	8/12/18	1
Case1	CustomerID_1075	view	8/18/18	6
Case1	CustomerID_1076	view	8/14/18	1
Case1	CustomerID_1077	view	8/13/18	3
Case1	CustomerID_1078	view	8/13/18	1
Case1	CustomerID_1079	view	8/12/18	6
Case1	CustomerID_1080	view	8/19/18	5
Case1	CustomerID_1081	view	8/17/18	1
Case1	CustomerID_1082	view	8/10/18	1
Case1	CustomerID_1083	view	8/19/18	1
Case1	CustomerID_1084	view	8/14/18	1
Case1	CustomerID_1085	view	8/13/18	1
Case1	CustomerID_1086	view	8/11/18	12
Case1	CustomerID_1087	view	8/10/18	6
Case1	CustomerID_1088	view	8/10/18	2
Case1	CustomerID_1088	view	8/15/18	2
Case1	CustomerID_1089	view	8/10/18	3
Case1	CustomerID_1089	view	8/13/18	4
Case1	CustomerID_1090	view	8/18/18	18
Case1	CustomerID_1091	view	8/17/18	1
Case1	CustomerID_1092	view	8/11/18	1
Case1	CustomerID_1093	view	8/19/18	3
Case1	CustomerID_1094	view	8/11/18	1
Case1	CustomerID_1095	view	8/11/18	1
Case1	CustomerID_1096	view	8/19/18	5
Case1	CustomerID_1097	view	8/12/18	4
Case1	CustomerID_1098	view	8/14/18	1
Case1	CustomerID_1099	view	8/12/18	1
Case1	CustomerID_1100	view	8/19/18	1
Case1	CustomerID_1101	view	8/19/18	3
Case1	CustomerID_1102	view	8/11/18	1
Case1	CustomerID_1103	view	8/12/18	4
Case1	CustomerID_1104	view	8/16/18	1
Case1	CustomerID_1105	view	8/12/18	1
Case1	CustomerID_1106	view	8/11/18	1
Case1	CustomerID_1107	view	8/16/18	1
Case1	CustomerID_1108	view	8/13/18	2
Case1	CustomerID_1109	view	8/14/18	1
Case1	CustomerID_1110	view	8/10/18	1
Case1	CustomerID_1111	view	8/17/18	3
Case1	CustomerID_1112	view	8/19/18	1
Case1	CustomerID_1113	view	8/12/18	1
Case1	CustomerID_1114	view	8/19/18	1
Case1	CustomerID_1115	view	8/17/18	1
Case1	CustomerID_1116	view	8/11/18	1
Case1	CustomerID_1117	view	8/11/18	1
Case1	CustomerID_1118	view	8/13/18	1
Case1	CustomerID_1119	view	8/10/18	1
Case1	CustomerID_1119	view	8/16/18	4
Case1	CustomerID_1120	view	8/12/18	4
Case1	CustomerID_1120	view	8/19/18	3
Case1	CustomerID_1121	view	8/19/18	3
Case1	CustomerID_1122	view	8/10/18	16
Case1	CustomerID_1123	view	8/14/18	1
Case1	CustomerID_1124	view	8/15/18	2
Case1	CustomerID_1125	view	8/11/18	9
Case1	CustomerID_1126	view	8/11/18	6
Case1	CustomerID_1127	view	8/11/18	1
Case1	CustomerID_1128	view	8/10/18	1
Case1	CustomerID_1129	view	8/11/18	1
Case1	CustomerID_1130	view	8/17/18	1
Case1	CustomerID_1131	view	8/15/18	1
Case1	CustomerID_1132	view	8/17/18	1
Case1	CustomerID_1133	view	8/14/18	5
Case1	CustomerID_1133	view	8/15/18	1
Case1	CustomerID_1134	view	8/16/18	1
Case1	CustomerID_1135	view	8/13/18	1
Case1	CustomerID_1136	view	8/11/18	1
Case1	CustomerID_1137	view	8/19/18	5
Case1	CustomerID_1138	view	8/11/18	1
Case1	CustomerID_1138	view	8/14/18	2
Case1	CustomerID_1139	view	8/11/18	1
Case1	CustomerID_1140	view	8/10/18	1
Case1	CustomerID_1141	view	8/16/18	1
Case1	CustomerID_1142	view	8/14/18	1
Case1	CustomerID_1143	view	8/15/18	1
Case1	CustomerID_1144	view	8/16/18	1
Case1	CustomerID_1145	view	8/15/18	1
Case1	CustomerID_1146	view	8/14/18	1
Case1	CustomerID_1147	view	8/17/18	1
Case1	CustomerID_1148	view	8/12/18	2
Case1	CustomerID_1149	view	8/11/18	1
Case1	CustomerID_1150	view	8/19/18	3
Case1	CustomerID_1151	view	8/13/18	30
Case1	CustomerID_1152	view	8/15/18	1
Case1	CustomerID_1153	view	8/11/18	1
Case1	CustomerID_1154	view	8/15/18	1
Case1	CustomerID_1155	view	8/18/18	8
Case1	CustomerID_1155	view	8/19/18	1
Case1	CustomerID_1156	view	8/18/18	1
Case1	CustomerID_1157	view	8/10/18	9
Case1	CustomerID_1157	view	8/11/18	1
Case1	CustomerID_1158	view	8/12/18	1
Case1	CustomerID_1158	view	8/18/18	2
Case1	CustomerID_1159	view	8/14/18	3
Case1	CustomerID_1159	view	8/18/18	2
Case1	CustomerID_1160	view	8/19/18	1
Case1	CustomerID_1161	view	8/15/18	38
Case1	CustomerID_1162	view	8/10/18	1
Case1	CustomerID_1163	view	8/12/18	1
Case1	CustomerID_1164	view	8/13/18	5
Case1	CustomerID_1165	view	8/17/18	1
Case1	CustomerID_1166	view	8/18/18	1
Case1	CustomerID_1167	view	8/17/18	1
Case1	CustomerID_1168	view	8/16/18	1
Case1	CustomerID_1169	view	8/14/18	1
Case1	CustomerID_1170	view	8/19/18	3
Case1	CustomerID_1171	view	8/13/18	3
Case1	CustomerID_1171	view	8/16/18	2
Case1	CustomerID_1172	view	8/10/18	1
Case1	CustomerID_1173	view	8/13/18	1
Case1	CustomerID_1174	view	8/18/18	2
Case1	CustomerID_1175	view	8/10/18	1
Case1	CustomerID_1176	view	8/17/18	1
Case1	CustomerID_1177	view	8/15/18	3
Case1	CustomerID_1178	view	8/13/18	2
Case1	CustomerID_1179	view	8/12/18	1
Case1	CustomerID_1180	view	8/12/18	1
Case1	CustomerID_1181	view	8/11/18	1
Case1	CustomerID_1182	view	8/11/18	1
Case1	CustomerID_1183	view	8/16/18	1
Case1	CustomerID_1184	view	8/19/18	6
Case1	CustomerID_1185	view	8/11/18	5
Case1	CustomerID_1185	view	8/12/18	6
Case1	CustomerID_1185	view	8/13/18	1
Case1	CustomerID_1186	view	8/14/18	1
Case1	CustomerID_1187	view	8/17/18	1
Case1	CustomerID_1188	view	8/18/18	1
Case1	CustomerID_1189	view	8/10/18	1
Case1	CustomerID_1190	view	8/11/18	1
Case1	CustomerID_1191	view	8/13/18	9
Case1	CustomerID_1192	view	8/12/18	6
Case1	CustomerID_1193	view	8/10/18	1
Case1	CustomerID_1194	view	8/10/18	1
Case1	CustomerID_1195	view	8/15/18	2
Case1	CustomerID_1196	view	8/18/18	2
Case1	CustomerID_1197	view	8/18/18	1
Case1	CustomerID_1198	view	8/14/18	3
Case1	CustomerID_1199	view	8/18/18	6
Case1	CustomerID_1200	view	8/16/18	1
Case1	CustomerID_1201	view	8/10/18	1
Case1	CustomerID_1202	view	8/14/18	4
Case1	CustomerID_1203	view	8/16/18	2
Case1	CustomerID_1204	view	8/12/18	1
Case1	CustomerID_1205	view	8/10/18	2
Case1	CustomerID_1206	view	8/16/18	1
Case1	CustomerID_1207	view	8/15/18	1
Case1	CustomerID_1208	view	8/10/18	1
Case1	CustomerID_1209	view	8/19/18	1
Case1	CustomerID_1210	view	8/14/18	1
Case1	CustomerID_1211	view	8/11/18	28
Case1	CustomerID_1212	view	8/13/18	1
Case1	CustomerID_1213	view	8/16/18	2
Case1	CustomerID_1214	view	8/17/18	1
Case1	CustomerID_1215	view	8/10/18	3
Case1	CustomerID_1216	view	8/12/18	1
Case1	CustomerID_1217	view	8/11/18	1
Case1	CustomerID_1218	view	8/19/18	1
Case1	CustomerID_1219	view	8/18/18	3
Case1	CustomerID_1220	view	8/11/18	1
Case1	CustomerID_1221	view	8/12/18	1
Case1	CustomerID_1222	view	8/11/18	10
Case1	CustomerID_1223	view	8/18/18	1
Case1	CustomerID_1224	view	8/10/18	1
Case1	CustomerID_1225	view	8/10/18	4
Case1	CustomerID_1226	view	8/12/18	1
Case1	CustomerID_1227	view	8/17/18	3
Case1	CustomerID_1228	view	8/16/18	3
Case1	CustomerID_1229	view	8/16/18	1
Case1	CustomerID_1230	view	8/11/18	6
Case1	CustomerID_1231	view	8/12/18	1
Case1	CustomerID_1232	view	8/19/18	2
Case1	CustomerID_1233	view	8/18/18	3
Case1	CustomerID_1234	view	8/18/18	2
Case1	CustomerID_1235	view	8/12/18	7
Case1	CustomerID_1235	view	8/13/18	3
Case1	CustomerID_1236	view	8/13/18	1
Case1	CustomerID_1237	view	8/18/18	9
Case1	CustomerID_1237	view	8/19/18	3
Case1	CustomerID_1238	view	8/14/18	2
Case1	CustomerID_1239	view	8/12/18	1
Case1	CustomerID_1240	view	8/12/18	2
Case1	CustomerID_1240	view	8/19/18	1
Case1	CustomerID_1241	view	8/14/18	1
Case1	CustomerID_1242	view	8/10/18	2
Case1	CustomerID_1242	view	8/12/18	1
Case1	CustomerID_1242	view	8/13/18	1
Case1	CustomerID_1242	view	8/16/18	1
Case1	CustomerID_1242	view	8/19/18	1
Case1	CustomerID_1243	view	8/19/18	2
Case1	CustomerID_1244	view	8/19/18	1
Case1	CustomerID_1245	view	8/18/18	5
Case1	CustomerID_1246	view	8/10/18	4
Case1	CustomerID_1247	view	8/16/18	2
Case1	CustomerID_1248	view	8/11/18	2
Case1	CustomerID_1249	view	8/12/18	1
Case1	CustomerID_1250	view	8/15/18	2
Case1	CustomerID_1251	view	8/15/18	3
Case1	CustomerID_1252	view	8/13/18	5
Case1	CustomerID_1253	view	8/16/18	2
Case1	CustomerID_1254	view	8/15/18	2
Case1	CustomerID_1255	view	8/18/18	2
Case1	CustomerID_1256	view	8/13/18	3
Case1	CustomerID_1256	view	8/14/18	7
Case1	CustomerID_1257	view	8/14/18	1
Case1	CustomerID_1258	view	8/19/18	1
Case1	CustomerID_1259	view	8/17/18	1
Case1	CustomerID_1260	view	8/10/18	1
Case1	CustomerID_1261	view	8/11/18	1
Case1	CustomerID_1262	view	8/11/18	8
Case1	CustomerID_1263	view	8/15/18	1
Case1	CustomerID_1264	view	8/19/18	1
Case1	CustomerID_1265	view	8/12/18	1
Case1	CustomerID_1266	view	8/12/18	6
Case1	CustomerID_1267	view	8/15/18	2
Case1	CustomerID_1268	view	8/12/18	6
Case1	CustomerID_1268	view	8/13/18	15
Case1	CustomerID_1268	view	8/16/18	2
Case1	CustomerID_1269	view	8/10/18	3
Case1	CustomerID_1270	view	8/18/18	4
Case1	CustomerID_1271	view	8/18/18	1
Case1	CustomerID_1272	view	8/12/18	3
Case1	CustomerID_1273	view	8/14/18	18
Case1	CustomerID_1274	view	8/19/18	1
Case1	CustomerID_1275	view	8/10/18	2
Case1	CustomerID_1276	view	8/18/18	6
Case1	CustomerID_1277	view	8/11/18	1
Case1	CustomerID_1278	view	8/17/18	4
Case1	CustomerID_1279	view	8/15/18	2
Case1	CustomerID_1280	view	8/15/18	1
Case1	CustomerID_1281	view	8/15/18	2
Case1	CustomerID_1282	view	8/18/18	2
Case1	CustomerID_1283	view	8/17/18	1
Case1	CustomerID_1284	view	8/13/18	1
Case1	CustomerID_1285	view	8/11/18	22
Case1	CustomerID_1286	view	8/15/18	1
Case1	CustomerID_1287	view	8/11/18	5
Case1	CustomerID_1288	view	8/14/18	1
Case1	CustomerID_1289	view	8/12/18	1
Case1	CustomerID_1290	view	8/16/18	1
Case1	CustomerID_1291	view	8/17/18	1
Case1	CustomerID_1292	view	8/11/18	8
Case1	CustomerID_1293	view	8/17/18	1
Case1	CustomerID_1294	view	8/16/18	1
Case1	CustomerID_1295	view	8/15/18	1
Case1	CustomerID_1296	view	8/10/18	1
Case1	CustomerID_1297	view	8/19/18	39
Case1	CustomerID_1298	view	8/13/18	3
Case1	CustomerID_1299	view	8/12/18	1
Case1	CustomerID_1300	view	8/17/18	1
Case1	CustomerID_1301	view	8/10/18	2
Case1	CustomerID_1302	view	8/16/18	1
Case1	CustomerID_1302	view	8/17/18	2
Case1	CustomerID_1303	view	8/15/18	1
Case1	CustomerID_1304	view	8/17/18	1
Case1	CustomerID_1305	view	8/19/18	1
Case1	CustomerID_1306	view	8/19/18	1
Case1	CustomerID_1307	view	8/17/18	1
Case1	CustomerID_1308	view	8/18/18	1
Case1	CustomerID_1309	view	8/17/18	1
Case1	CustomerID_1310	view	8/19/18	1
Case1	CustomerID_1311	view	8/18/18	5
Case1	CustomerID_1312	view	8/18/18	1
Case1	CustomerID_1313	view	8/18/18	1
Case1	CustomerID_1314	view	8/16/18	1
Case1	CustomerID_1315	view	8/12/18	1
Case1	CustomerID_1316	view	8/11/18	1
Case1	CustomerID_1317	view	8/13/18	1
Case1	CustomerID_1318	view	8/18/18	1
Case1	CustomerID_1319	view	8/17/18	1
Case1	CustomerID_1320	view	8/18/18	1
Case1	CustomerID_1321	view	8/13/18	1
Case1	CustomerID_1322	view	8/19/18	1
Case1	CustomerID_1323	view	8/15/18	1
Case1	CustomerID_1324	view	8/16/18	2
Case1	CustomerID_1325	view	8/18/18	1
Case1	CustomerID_1326	view	8/14/18	2
Case1	CustomerID_1327	view	8/14/18	1
Case1	CustomerID_1328	view	8/11/18	3
Case1	CustomerID_1328	view	8/12/18	7
Case1	CustomerID_1328	view	8/15/18	1
Case1	CustomerID_1329	view	8/11/18	1
Case1	CustomerID_1330	view	8/11/18	1
Case1	CustomerID_1331	view	8/12/18	2
Case1	CustomerID_1332	view	8/10/18	2
Case1	CustomerID_1333	view	8/12/18	2
Case1	CustomerID_1334	view	8/12/18	2
Case1	CustomerID_1334	view	8/18/18	4
Case1	CustomerID_1334	view	8/19/18	3
Case1	CustomerID_1335	view	8/18/18	5
Case1	CustomerID_1336	view	8/13/18	3
Case1	CustomerID_1337	view	8/13/18	2
Case1	CustomerID_1338	view	8/17/18	1
Case1	CustomerID_1339	view	8/11/18	1
Case1	CustomerID_1340	view	8/15/18	6
Case1	CustomerID_1341	view	8/17/18	7
Case1	CustomerID_1342	view	8/15/18	1
Case1	CustomerID_1343	view	8/12/18	2
Case1	CustomerID_1344	view	8/18/18	1
Case1	CustomerID_1345	view	8/16/18	1
Case1	CustomerID_1346	view	8/13/18	1
Case1	CustomerID_1347	view	8/10/18	1
Case1	CustomerID_1348	view	8/16/18	9
Case1	CustomerID_1349	view	8/12/18	1
Case1	CustomerID_1350	view	8/10/18	10
Case1	CustomerID_1351	view	8/15/18	1
Case1	CustomerID_1352	view	8/13/18	7
Case1	CustomerID_1352	view	8/14/18	19
Case1	CustomerID_1352	view	8/16/18	1
Case1	CustomerID_1353	view	8/15/18	2
Case1	CustomerID_1354	view	8/17/18	1
Case1	CustomerID_1355	view	8/16/18	4
Case1	CustomerID_1356	view	8/17/18	5
Case1	CustomerID_1357	view	8/12/18	1
Case1	CustomerID_1358	view	8/16/18	2
Case1	CustomerID_1359	view	8/14/18	1
Case1	CustomerID_1360	view	8/19/18	1
Case1	CustomerID_1361	view	8/15/18	1
Case1	CustomerID_1362	view	8/17/18	5
Case1	CustomerID_1363	view	8/17/18	1
Case1	CustomerID_1364	view	8/13/18	16
Case1	CustomerID_1365	view	8/19/18	1
Case1	CustomerID_1366	view	8/10/18	6
Case1	CustomerID_1367	view	8/11/18	1
Case1	CustomerID_1368	view	8/11/18	2
Case1	CustomerID_1369	view	8/18/18	3
Case1	CustomerID_1370	view	8/12/18	1
Case1	CustomerID_1371	view	8/17/18	6
Case1	CustomerID_1372	view	8/12/18	1
Case1	CustomerID_1372	view	8/17/18	2
Case1	CustomerID_1372	view	8/19/18	8
Case1	CustomerID_1373	view	8/17/18	1
Case1	CustomerID_1374	view	8/15/18	20
Case1	CustomerID_1375	view	8/13/18	2
Case1	CustomerID_1376	view	8/10/18	1
Case1	CustomerID_1377	view	8/15/18	2
Case1	CustomerID_1378	view	8/16/18	6
Case1	CustomerID_1379	view	8/17/18	5
Case1	CustomerID_1380	view	8/11/18	1
Case1	CustomerID_1381	view	8/18/18	1
Case1	CustomerID_1382	view	8/15/18	1
Case1	CustomerID_1383	view	8/17/18	1
Case1	CustomerID_1384	view	8/13/18	1
Case1	CustomerID_1385	view	8/17/18	1
Case1	CustomerID_1386	view	8/15/18	1
Case1	CustomerID_1387	view	8/11/18	5
Case1	CustomerID_1387	view	8/12/18	1
Case1	CustomerID_1388	view	8/15/18	1
Case1	CustomerID_1389	view	8/18/18	2
Case1	CustomerID_1390	view	8/18/18	1
Case1	CustomerID_1391	view	8/15/18	1
Case1	CustomerID_1392	view	8/16/18	1
Case1	CustomerID_1393	view	8/18/18	7
Case1	CustomerID_1394	view	8/17/18	1
Case1	CustomerID_1395	view	8/10/18	2
Case1	CustomerID_1396	view	8/19/18	5
Case1	CustomerID_1397	view	8/14/18	1
Case1	CustomerID_1398	view	8/16/18	1
Case1	CustomerID_1399	view	8/16/18	1
Case1	CustomerID_1400	view	8/16/18	1
Case1	CustomerID_1401	view	8/11/18	2
Case1	CustomerID_1402	view	8/10/18	1
Case1	CustomerID_1403	view	8/15/18	2
Case1	CustomerID_1404	view	8/15/18	1
Case1	CustomerID_1405	view	8/14/18	1
Case1	CustomerID_1406	view	8/11/18	1
Case1	CustomerID_1406	view	8/12/18	1
Case1	CustomerID_1407	view	8/14/18	3
Case1	CustomerID_1408	view	8/15/18	1
Case1	CustomerID_1409	view	8/17/18	22
Case1	CustomerID_1410	view	8/12/18	23
Case1	CustomerID_1410	view	8/14/18	15
Case1	CustomerID_1411	view	8/14/18	1
Case1	CustomerID_1412	view	8/10/18	4
Case1	CustomerID_1413	view	8/18/18	1
Case1	CustomerID_1414	view	8/19/18	7
Case1	CustomerID_1415	view	8/12/18	1
Case1	CustomerID_1416	view	8/14/18	1
Case1	CustomerID_1417	view	8/10/18	1
Case1	CustomerID_1418	view	8/19/18	1
Case1	CustomerID_1419	view	8/12/18	1
Case1	CustomerID_1420	view	8/10/18	3
Case1	CustomerID_1421	view	8/15/18	1
Case1	CustomerID_1422	view	8/16/18	1
Case1	CustomerID_1423	view	8/12/18	1
Case1	CustomerID_1424	view	8/17/18	2
Case1	CustomerID_1425	view	8/14/18	3
Case1	CustomerID_1426	view	8/19/18	1
Case1	CustomerID_1427	view	8/13/18	4
Case1	CustomerID_1428	view	8/18/18	1
Case1	CustomerID_1429	view	8/16/18	1
Case1	CustomerID_1430	view	8/15/18	1
Case1	CustomerID_1431	view	8/13/18	1
Case1	CustomerID_1432	view	8/13/18	1
Case1	CustomerID_1433	view	8/19/18	1
Case1	CustomerID_1434	view	8/18/18	1
Case1	CustomerID_1435	view	8/10/18	12
Case1	CustomerID_1436	view	8/14/18	1
Case1	CustomerID_1437	view	8/17/18	1
Case1	CustomerID_1438	view	8/10/18	2
Case1	CustomerID_1439	view	8/18/18	1
Case1	CustomerID_1440	view	8/10/18	43
Case1	CustomerID_1440	view	8/11/18	58
Case1	CustomerID_1440	view	8/12/18	196
Case1	CustomerID_1441	view	8/14/18	1
Case1	CustomerID_1442	view	8/19/18	8
Case1	CustomerID_1443	view	8/17/18	5
Case1	CustomerID_1444	view	8/19/18	1
Case1	CustomerID_1445	view	8/17/18	1
Case1	CustomerID_1446	view	8/18/18	34
Case1	CustomerID_1447	view	8/16/18	1
Case1	CustomerID_1448	view	8/18/18	1
Case1	CustomerID_1449	view	8/11/18	3
Case1	CustomerID_1450	view	8/15/18	1
Case1	CustomerID_1451	view	8/10/18	1
Case1	CustomerID_1452	view	8/19/18	2
Case1	CustomerID_1453	view	8/13/18	9
Case1	CustomerID_1454	view	8/16/18	3
Case1	CustomerID_1455	view	8/10/18	1
Case1	CustomerID_1455	view	8/13/18	1
Case1	CustomerID_1456	view	8/15/18	1
Case1	CustomerID_1457	view	8/19/18	1
Case1	CustomerID_1458	view	8/18/18	17
Case1	CustomerID_1459	view	8/17/18	3
Case1	CustomerID_1460	view	8/16/18	1
Case1	CustomerID_1461	view	8/19/18	2
Case1	CustomerID_1462	view	8/19/18	1
Case1	CustomerID_1463	view	8/16/18	1
Case1	CustomerID_1464	view	8/16/18	8
Case1	CustomerID_1465	view	8/10/18	1
Case1	CustomerID_1466	view	8/12/18	2
Case1	CustomerID_1467	view	8/14/18	8
Case1	CustomerID_1468	view	8/16/18	1
Case1	CustomerID_1469	view	8/17/18	2
Case1	CustomerID_1470	view	8/14/18	1
Case1	CustomerID_1471	view	8/16/18	1
Case1	CustomerID_1472	view	8/17/18	1
Case1	CustomerID_1473	view	8/11/18	10
Case1	CustomerID_1473	view	8/14/18	2
Case1	CustomerID_1473	view	8/17/18	14
Case1	CustomerID_1474	view	8/18/18	1
Case1	CustomerID_1475	view	8/16/18	7
Case1	CustomerID_1476	view	8/11/18	1
Case1	CustomerID_1477	view	8/12/18	1
Case1	CustomerID_1478	view	8/14/18	1
Case1	CustomerID_1479	view	8/13/18	2
Case1	CustomerID_1480	view	8/17/18	1
Case1	CustomerID_1481	view	8/11/18	6
Case1	CustomerID_1482	view	8/13/18	2
Case1	CustomerID_1483	view	8/14/18	5
Case1	CustomerID_1484	view	8/15/18	1
Case1	CustomerID_1485	view	8/12/18	1
Case1	CustomerID_1486	view	8/10/18	4
Case1	CustomerID_1487	view	8/12/18	1
Case1	CustomerID_1488	view	8/17/18	1
Case1	CustomerID_1489	view	8/12/18	1
Case1	CustomerID_1490	view	8/18/18	1
Case1	CustomerID_1491	view	8/12/18	1
Case1	CustomerID_1492	view	8/19/18	7
Case1	CustomerID_1493	view	8/16/18	1
Case1	CustomerID_1494	view	8/12/18	1
Case1	CustomerID_1495	view	8/12/18	2
Case1	CustomerID_1496	view	8/10/18	29
Case1	CustomerID_1497	view	8/16/18	47
Case1	CustomerID_1497	view	8/17/18	15
Case1	CustomerID_1497	view	8/19/18	9
Case1	CustomerID_1498	view	8/19/18	1
Case1	CustomerID_1499	view	8/13/18	2
Case1	CustomerID_1499	view	8/14/18	4
Case1	CustomerID_1499	view	8/15/18	2
Case1	CustomerID_1500	view	8/16/18	1
Case1	CustomerID_1501	view	8/16/18	2
Case1	CustomerID_1502	view	8/14/18	1
Case1	CustomerID_1503	view	8/13/18	1
Case1	CustomerID_1504	view	8/18/18	1
Case1	CustomerID_1505	view	8/10/18	10
Case1	CustomerID_1506	view	8/10/18	1
Case1	CustomerID_1506	view	8/11/18	5
Case1	CustomerID_1507	view	8/16/18	1
Case1	CustomerID_1508	view	8/14/18	1
Case1	CustomerID_1509	view	8/17/18	1
Case1	CustomerID_1510	view	8/18/18	1
Case1	CustomerID_1511	view	8/14/18	1
Case1	CustomerID_1512	view	8/18/18	1
Case1	CustomerID_1513	view	8/10/18	1
Case1	CustomerID_1514	view	8/12/18	1
Case1	CustomerID_1515	view	8/14/18	1
Case1	CustomerID_1516	view	8/19/18	11
Case1	CustomerID_1517	view	8/10/18	10
Case1	CustomerID_1518	view	8/16/18	1
Case1	CustomerID_1519	view	8/12/18	6
Case1	CustomerID_1520	view	8/15/18	18
Case1	CustomerID_1521	view	8/14/18	1
Case1	CustomerID_1522	view	8/12/18	5
Case1	CustomerID_1523	view	8/16/18	1
Case1	CustomerID_1524	view	8/12/18	1
Case1	CustomerID_1525	view	8/15/18	1
Case1	CustomerID_1526	view	8/10/18	18
Case1	CustomerID_1526	view	8/19/18	1
Case1	CustomerID_1527	view	8/14/18	3
Case1	CustomerID_1528	view	8/11/18	14
Case1	CustomerID_1529	view	8/18/18	1
Case1	CustomerID_1530	view	8/12/18	1
Case1	CustomerID_1531	view	8/10/18	7
Case1	CustomerID_1531	view	8/14/18	5
Case1	CustomerID_1531	view	8/16/18	4
Case1	CustomerID_1531	view	8/17/18	2
Case1	CustomerID_1532	view	8/18/18	3
Case1	CustomerID_1533	view	8/13/18	2
Case1	CustomerID_1534	view	8/11/18	1
Case1	CustomerID_1535	view	8/18/18	4
Case1	CustomerID_1536	view	8/18/18	1
Case1	CustomerID_1537	view	8/15/18	2
Case1	CustomerID_1538	view	8/19/18	1
Case1	CustomerID_1539	view	8/13/18	1
Case1	CustomerID_1540	view	8/13/18	1
Case1	CustomerID_1541	view	8/17/18	1
Case1	CustomerID_1542	view	8/11/18	1
Case1	CustomerID_1543	view	8/15/18	2
Case1	CustomerID_1544	view	8/10/18	6
Case1	CustomerID_1545	view	8/11/18	17
Case1	CustomerID_1546	view	8/18/18	3
Case1	CustomerID_1547	view	8/11/18	2
Case1	CustomerID_1548	view	8/17/18	1
Case1	CustomerID_1549	view	8/13/18	1
Case1	CustomerID_1550	view	8/19/18	1
Case1	CustomerID_1551	view	8/13/18	3
Case1	CustomerID_1552	view	8/16/18	1
Case1	CustomerID_1553	view	8/11/18	15
Case1	CustomerID_1554	view	8/15/18	15
Case1	CustomerID_1555	view	8/10/18	1
Case1	CustomerID_1556	view	8/12/18	14
Case1	CustomerID_1557	view	8/18/18	1
Case1	CustomerID_1558	view	8/17/18	1
Case1	CustomerID_1559	view	8/16/18	1
Case1	CustomerID_1560	view	8/13/18	4
Case1	CustomerID_1560	view	8/17/18	1
Case1	CustomerID_1561	view	8/15/18	1
Case1	CustomerID_1562	view	8/12/18	1
Case1	CustomerID_1563	view	8/16/18	1
Case1	CustomerID_1564	view	8/12/18	1
Case1	CustomerID_1565	view	8/14/18	1
Case1	CustomerID_1566	view	8/18/18	1
Case1	CustomerID_1566	view	8/19/18	1
Case1	CustomerID_1567	view	8/10/18	9
Case1	CustomerID_1568	view	8/17/18	2
Case1	CustomerID_1569	view	8/12/18	2
Case1	CustomerID_1569	view	8/13/18	5
Case1	CustomerID_1569	view	8/15/18	1
Case1	CustomerID_1569	view	8/18/18	1
Case1	CustomerID_1570	view	8/11/18	1
Case1	CustomerID_1571	view	8/13/18	2
Case1	CustomerID_1572	view	8/17/18	1
Case1	CustomerID_1573	view	8/16/18	1
Case1	CustomerID_1574	view	8/16/18	1
Case1	CustomerID_1574	view	8/17/18	2
Case1	CustomerID_1575	view	8/19/18	1
Case1	CustomerID_1576	view	8/17/18	1
Case1	CustomerID_1577	view	8/12/18	1
Case1	CustomerID_1578	view	8/13/18	1
Case1	CustomerID_1579	view	8/13/18	1
Case1	CustomerID_1580	view	8/16/18	17
Case1	CustomerID_1580	view	8/17/18	2
Case1	CustomerID_1580	view	8/18/18	6
Case1	CustomerID_1581	view	8/11/18	3
Case1	CustomerID_1582	view	8/11/18	2
Case1	CustomerID_1583	view	8/14/18	3
Case1	CustomerID_1584	view	8/19/18	2
Case1	CustomerID_1585	view	8/10/18	1
Case1	CustomerID_1586	view	8/11/18	1
Case1	CustomerID_1587	view	8/13/18	1
Case1	CustomerID_1588	view	8/11/18	1
Case1	CustomerID_1589	view	8/19/18	2
Case1	CustomerID_1590	view	8/13/18	1
Case1	CustomerID_1591	view	8/11/18	1
Case1	CustomerID_1592	view	8/18/18	1
Case1	CustomerID_1593	view	8/12/18	5
Case1	CustomerID_1594	view	8/10/18	2
Case1	CustomerID_1595	view	8/18/18	3
Case1	CustomerID_1596	view	8/14/18	1
Case1	CustomerID_1597	view	8/14/18	4
Case1	CustomerID_1598	view	8/18/18	4
Case1	CustomerID_1599	view	8/15/18	1
Case1	CustomerID_1600	view	8/13/18	1
Case1	CustomerID_1601	view	8/17/18	1
Case1	CustomerID_1602	view	8/10/18	1
Case1	CustomerID_1603	view	8/11/18	1
Case1	CustomerID_1604	view	8/10/18	7
Case1	CustomerID_1605	view	8/10/18	1
Case1	CustomerID_1606	view	8/19/18	1
Case1	CustomerID_1607	view	8/11/18	1
Case1	CustomerID_1608	view	8/18/18	1
Case1	CustomerID_1609	view	8/13/18	1
Case1	CustomerID_1610	view	8/11/18	2
Case1	CustomerID_1611	view	8/18/18	1
Case1	CustomerID_1612	view	8/10/18	1
Case1	CustomerID_1613	view	8/16/18	3
Case1	CustomerID_1614	view	8/16/18	1
Case1	CustomerID_1615	view	8/13/18	1
Case1	CustomerID_1616	view	8/14/18	1
Case1	CustomerID_1617	view	8/12/18	1
Case1	CustomerID_1618	view	8/14/18	1
Case1	CustomerID_1619	view	8/15/18	1
Case1	CustomerID_1620	view	8/11/18	1
Case1	CustomerID_1621	view	8/18/18	12
Case1	CustomerID_1622	view	8/15/18	1
Case1	CustomerID_1623	view	8/18/18	2
Case1	CustomerID_1624	view	8/16/18	7
Case1	CustomerID_1624	view	8/17/18	1
Case1	CustomerID_1625	view	8/12/18	8
Case1	CustomerID_1626	view	8/18/18	1
Case1	CustomerID_1627	view	8/18/18	33
Case1	CustomerID_1627	view	8/19/18	15
Case1	CustomerID_1628	view	8/19/18	1
Case1	CustomerID_1629	view	8/12/18	13
Case1	CustomerID_1630	view	8/19/18	1
Case1	CustomerID_1631	view	8/13/18	2
Case1	CustomerID_1632	view	8/12/18	1
Case1	CustomerID_1633	view	8/19/18	1
Case1	CustomerID_1634	view	8/15/18	1
Case1	CustomerID_1635	view	8/12/18	1
Case1	CustomerID_1636	view	8/13/18	1
Case1	CustomerID_1637	view	8/12/18	1
Case1	CustomerID_1638	view	8/18/18	1
Case1	CustomerID_1639	view	8/16/18	1
Case1	CustomerID_1640	view	8/18/18	1
Case1	CustomerID_1641	view	8/10/18	6
Case1	CustomerID_1642	view	8/17/18	4
Case1	CustomerID_1642	view	8/18/18	1
Case1	CustomerID_1643	view	8/15/18	1
Case1	CustomerID_1644	view	8/19/18	1
Case1	CustomerID_1645	view	8/16/18	3
Case1	CustomerID_1646	view	8/11/18	1
Case1	CustomerID_1647	view	8/18/18	1
Case1	CustomerID_1648	view	8/19/18	11
Case1	CustomerID_1649	view	8/13/18	1
Case1	CustomerID_1650	view	8/12/18	1
Case1	CustomerID_1651	view	8/11/18	1
Case1	CustomerID_1652	view	8/19/18	10
Case1	CustomerID_1653	view	8/10/18	2
Case1	CustomerID_1654	view	8/11/18	1
Case1	CustomerID_1655	view	8/12/18	1
Case1	CustomerID_1656	view	8/16/18	16
Case1	CustomerID_1657	view	8/18/18	1
Case1	CustomerID_1658	view	8/15/18	1
Case1	CustomerID_1659	view	8/19/18	1
Case1	CustomerID_1660	view	8/17/18	1
Case1	CustomerID_1661	view	8/16/18	1
Case1	CustomerID_1662	view	8/18/18	1
Case1	CustomerID_1663	view	8/12/18	2
Case1	CustomerID_1664	view	8/15/18	3
Case1	CustomerID_1665	view	8/10/18	6
Case1	CustomerID_1665	view	8/19/18	1
Case1	CustomerID_1666	view	8/17/18	1
Case1	CustomerID_1667	view	8/12/18	3
Case1	CustomerID_1668	view	8/18/18	2
Case1	CustomerID_1669	view	8/14/18	1
Case1	CustomerID_1670	view	8/14/18	1
Case1	CustomerID_1671	view	8/11/18	1
Case1	CustomerID_1672	view	8/15/18	1
Case1	CustomerID_1673	view	8/18/18	2
Case1	CustomerID_1674	view	8/16/18	2
Case1	CustomerID_1675	view	8/16/18	1
Case1	CustomerID_1676	view	8/18/18	7
Case1	CustomerID_1677	view	8/11/18	3
Case1	CustomerID_1677	view	8/16/18	1
Case1	CustomerID_1678	view	8/17/18	2
Case1	CustomerID_1678	view	8/19/18	2
Case1	CustomerID_1679	view	8/19/18	1
Case1	CustomerID_1680	view	8/14/18	1
Case1	CustomerID_1681	view	8/17/18	12
Case1	CustomerID_1682	view	8/11/18	1
Case1	CustomerID_1683	view	8/13/18	5
Case1	CustomerID_1684	view	8/15/18	1
Case1	CustomerID_1685	view	8/12/18	1
Case1	CustomerID_1686	view	8/17/18	2
Case1	CustomerID_1687	view	8/19/18	4
Case1	CustomerID_1688	view	8/10/18	1
Case1	CustomerID_1689	view	8/16/18	1
Case1	CustomerID_1689	view	8/18/18	3
Case1	CustomerID_1689	view	8/19/18	5
Case1	CustomerID_1690	view	8/14/18	1
Case1	CustomerID_1691	view	8/16/18	1
Case1	CustomerID_1692	view	8/11/18	1
Case1	CustomerID_1693	view	8/11/18	6
Case1	CustomerID_1694	view	8/11/18	1
Case1	CustomerID_1695	view	8/16/18	4
Case1	CustomerID_1695	view	8/17/18	2
Case1	CustomerID_1696	view	8/13/18	2
Case1	CustomerID_1697	view	8/16/18	2
Case1	CustomerID_1698	view	8/18/18	1
Case1	CustomerID_1699	view	8/15/18	1
Case1	CustomerID_1700	view	8/14/18	2
Case1	CustomerID_1701	view	8/18/18	3
Case1	CustomerID_1702	view	8/11/18	1
Case1	CustomerID_1703	view	8/17/18	1
Case1	CustomerID_1704	view	8/15/18	16
Case1	CustomerID_1705	view	8/12/18	1
Case1	CustomerID_1706	view	8/18/18	1
Case1	CustomerID_1707	view	8/11/18	2
Case1	CustomerID_1708	view	8/14/18	1
Case1	CustomerID_1709	view	8/17/18	1
Case1	CustomerID_1710	view	8/10/18	1
Case1	CustomerID_1711	view	8/17/18	4
Case1	CustomerID_1712	view	8/14/18	1
Case1	CustomerID_1713	view	8/10/18	2
Case1	CustomerID_1714	view	8/15/18	1
Case1	CustomerID_1715	view	8/17/18	1
Case1	CustomerID_1716	view	8/19/18	1
Case1	CustomerID_1717	view	8/13/18	1
Case1	CustomerID_1718	view	8/14/18	1
Case1	CustomerID_1719	view	8/11/18	7
Case1	CustomerID_1720	view	8/15/18	3
Case1	CustomerID_1721	view	8/17/18	1
Case1	CustomerID_1722	view	8/10/18	1
Case1	CustomerID_1723	view	8/12/18	1
Case1	CustomerID_1724	view	8/19/18	3
Case1	CustomerID_1725	view	8/15/18	1
Case1	CustomerID_1726	view	8/15/18	6
Case1	CustomerID_1727	view	8/11/18	1
Case1	CustomerID_1728	view	8/16/18	1
Case1	CustomerID_1728	view	8/18/18	1
Case1	CustomerID_1729	view	8/15/18	9
Case1	CustomerID_1730	view	8/18/18	1
Case1	CustomerID_1731	view	8/12/18	1
Case1	CustomerID_1732	view	8/11/18	1
Case1	CustomerID_1733	view	8/10/18	1
Case1	CustomerID_1733	view	8/12/18	1
Case1	CustomerID_1734	view	8/10/18	4
Case1	CustomerID_1735	view	8/14/18	1
Case1	CustomerID_1736	view	8/11/18	1
Case1	CustomerID_1737	view	8/19/18	1
Case1	CustomerID_1738	view	8/15/18	1
Case1	CustomerID_1739	view	8/10/18	1
Case1	CustomerID_1740	view	8/19/18	1
Case1	CustomerID_1741	view	8/11/18	7
Case1	CustomerID_1742	view	8/13/18	2
Case1	CustomerID_1743	view	8/13/18	1
Case1	CustomerID_1744	view	8/12/18	1
Case1	CustomerID_1745	view	8/18/18	1
Case1	CustomerID_1746	view	8/11/18	1
Case1	CustomerID_1747	view	8/11/18	1
Case1	CustomerID_1748	view	8/18/18	2
Case1	CustomerID_1748	view	8/19/18	5
Case1	CustomerID_1749	view	8/13/18	1
Case1	CustomerID_1750	view	8/13/18	3
Case1	CustomerID_1751	view	8/10/18	1
Case1	CustomerID_1752	view	8/16/18	1
Case1	CustomerID_1753	view	8/11/18	1
Case1	CustomerID_1753	view	8/13/18	2
Case1	CustomerID_1753	view	8/18/18	1
Case1	CustomerID_1753	view	8/19/18	1
Case1	CustomerID_1754	view	8/13/18	1
Case1	CustomerID_1755	view	8/10/18	4
Case1	CustomerID_1755	view	8/11/18	1
Case1	CustomerID_1755	view	8/12/18	4
Case1	CustomerID_1756	view	8/19/18	1
Case1	CustomerID_1757	view	8/13/18	1
Case1	CustomerID_1758	view	8/14/18	1
Case1	CustomerID_1759	view	8/15/18	1
Case1	CustomerID_1760	view	8/12/18	7
Case1	CustomerID_1761	view	8/19/18	1
Case1	CustomerID_1762	view	8/14/18	1
Case1	CustomerID_1763	view	8/12/18	1
Case1	CustomerID_1764	view	8/13/18	1
Case1	CustomerID_1765	view	8/15/18	2
Case1	CustomerID_1766	view	8/14/18	1
Case1	CustomerID_1767	view	8/14/18	1
Case1	CustomerID_1768	view	8/14/18	1
Case1	CustomerID_1769	view	8/12/18	31
Case1	CustomerID_1770	view	8/14/18	2
Case1	CustomerID_1771	view	8/14/18	4
Case1	CustomerID_1772	view	8/14/18	4
Case1	CustomerID_1773	view	8/14/18	1
Case1	CustomerID_1774	view	8/11/18	16
Case1	CustomerID_1775	view	8/15/18	1
Case1	CustomerID_1776	view	8/15/18	1
Case1	CustomerID_1777	view	8/14/18	1
Case1	CustomerID_1778	view	8/11/18	1
Case1	CustomerID_1779	view	8/10/18	1
Case1	CustomerID_1780	view	8/18/18	3
Case1	CustomerID_1781	view	8/10/18	1
Case1	CustomerID_1781	view	8/19/18	1
Case1	CustomerID_1782	view	8/17/18	1
Case1	CustomerID_1783	view	8/17/18	1
Case1	CustomerID_1784	view	8/13/18	1
Case1	CustomerID_1784	view	8/14/18	1
Case1	CustomerID_1784	view	8/17/18	5
Case1	CustomerID_1785	view	8/16/18	1
Case1	CustomerID_1786	view	8/12/18	1
Case1	CustomerID_1786	view	8/18/18	1
Case1	CustomerID_1787	view	8/13/18	2
Case1	CustomerID_1787	view	8/14/18	2
Case1	CustomerID_1788	view	8/18/18	24
Case1	CustomerID_1788	view	8/19/18	1
Case1	CustomerID_1789	view	8/11/18	1
Case1	CustomerID_1790	view	8/14/18	2
Case1	CustomerID_1791	view	8/18/18	10
Case1	CustomerID_1792	view	8/15/18	1
Case1	CustomerID_1793	view	8/16/18	1
Case1	CustomerID_1794	view	8/18/18	1
Case1	CustomerID_1795	view	8/11/18	1
Case1	CustomerID_1796	view	8/11/18	2
Case1	CustomerID_1797	view	8/12/18	1
Case1	CustomerID_1798	view	8/15/18	1
Case1	CustomerID_1799	view	8/12/18	11
Case1	CustomerID_1799	view	8/13/18	3
Case1	CustomerID_1800	view	8/11/18	1
Case1	CustomerID_1801	view	8/19/18	1
Case1	CustomerID_1802	view	8/12/18	3
Case1	CustomerID_1803	view	8/10/18	1
Case1	CustomerID_1804	view	8/18/18	2
Case1	CustomerID_1805	view	8/18/18	9
Case1	CustomerID_1806	view	8/13/18	6
Case1	CustomerID_1806	view	8/16/18	5
Case1	CustomerID_1807	view	8/19/18	2
Case1	CustomerID_1808	view	8/18/18	1
Case1	CustomerID_1809	view	8/14/18	2
Case1	CustomerID_1810	view	8/15/18	3
Case1	CustomerID_1810	view	8/16/18	13
Case1	CustomerID_1810	view	8/18/18	6
Case1	CustomerID_1811	view	8/19/18	7
Case1	CustomerID_1812	view	8/13/18	5
Case1	CustomerID_1813	view	8/18/18	1
Case1	CustomerID_1814	view	8/16/18	2
Case1	CustomerID_1815	view	8/15/18	2
Case1	CustomerID_1816	view	8/16/18	8
[truncated: 94,445 more rows]
